# Supplementary material for: Epidemiology of Δ8THC-Related Carcinogenesis in USA: A Panel Regression and Causal Inferential Study
Source: MDPI journal article supplement (doi:10.3390/ijerph19137726), 2022-06-23

Cannabinoid Concentrations over Time, USA National Level

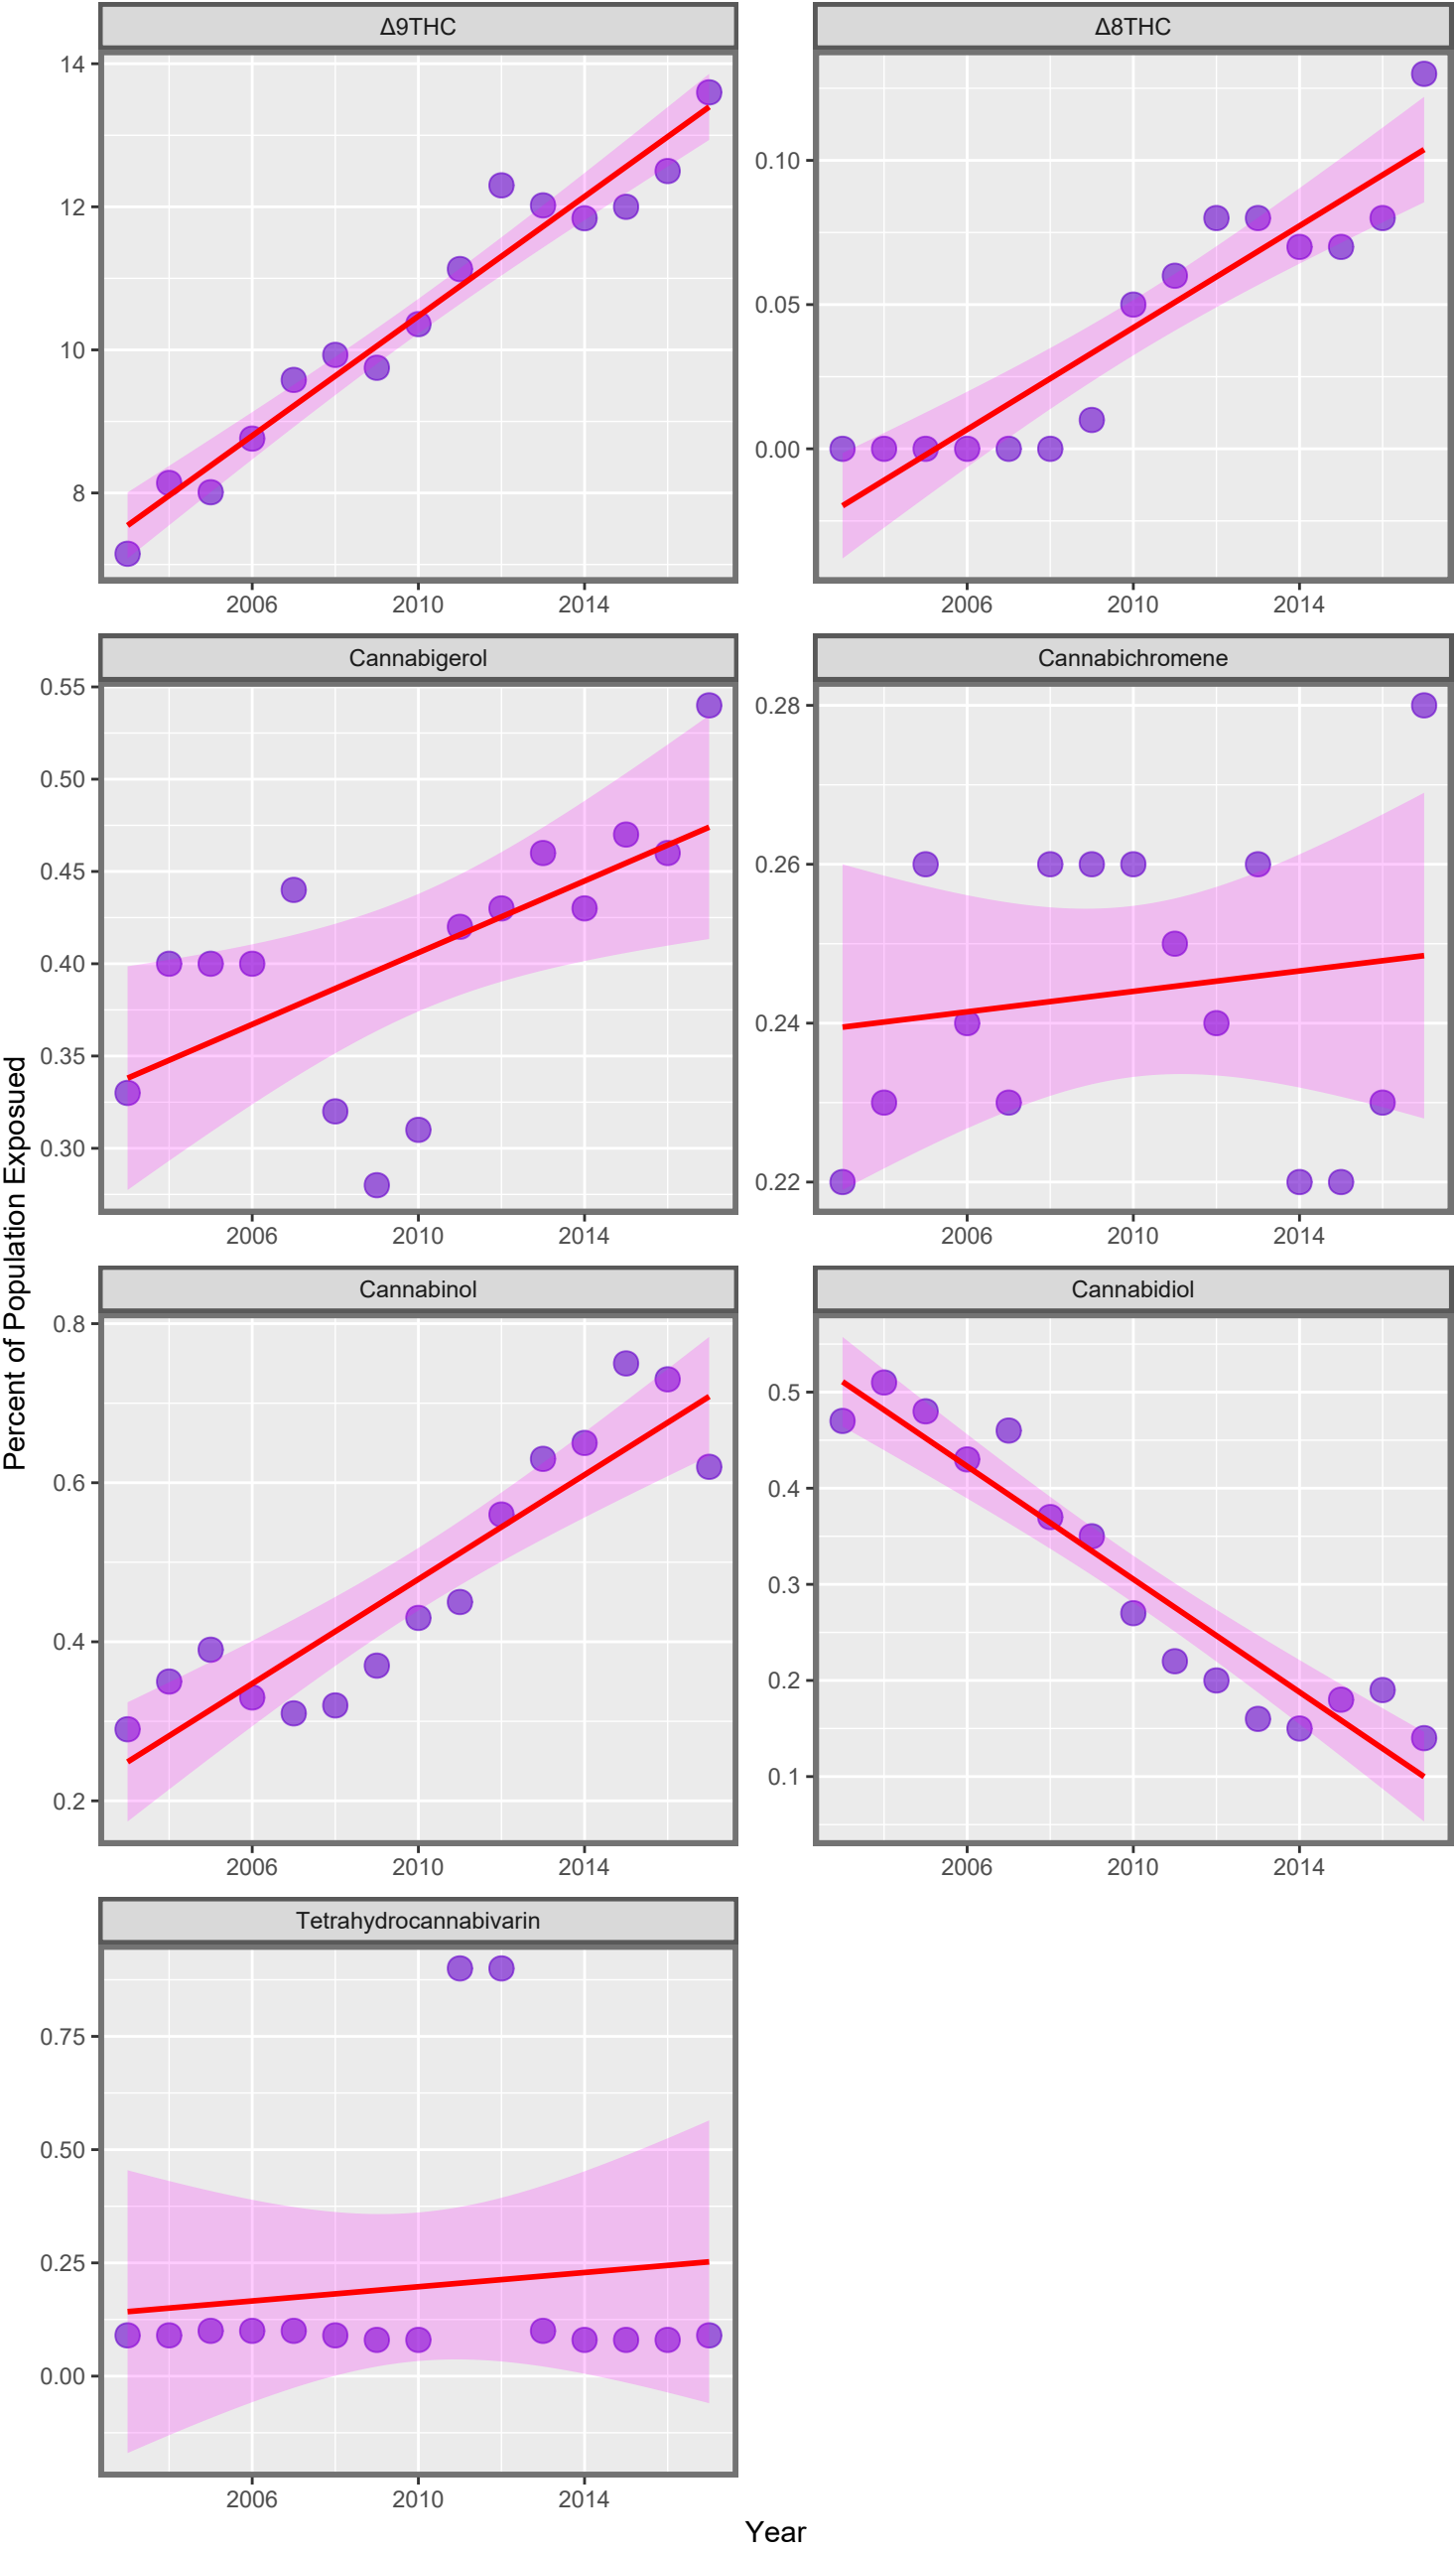

| 2009 | 2010 | 2011 |
|------|------|------|
|------|------|------|

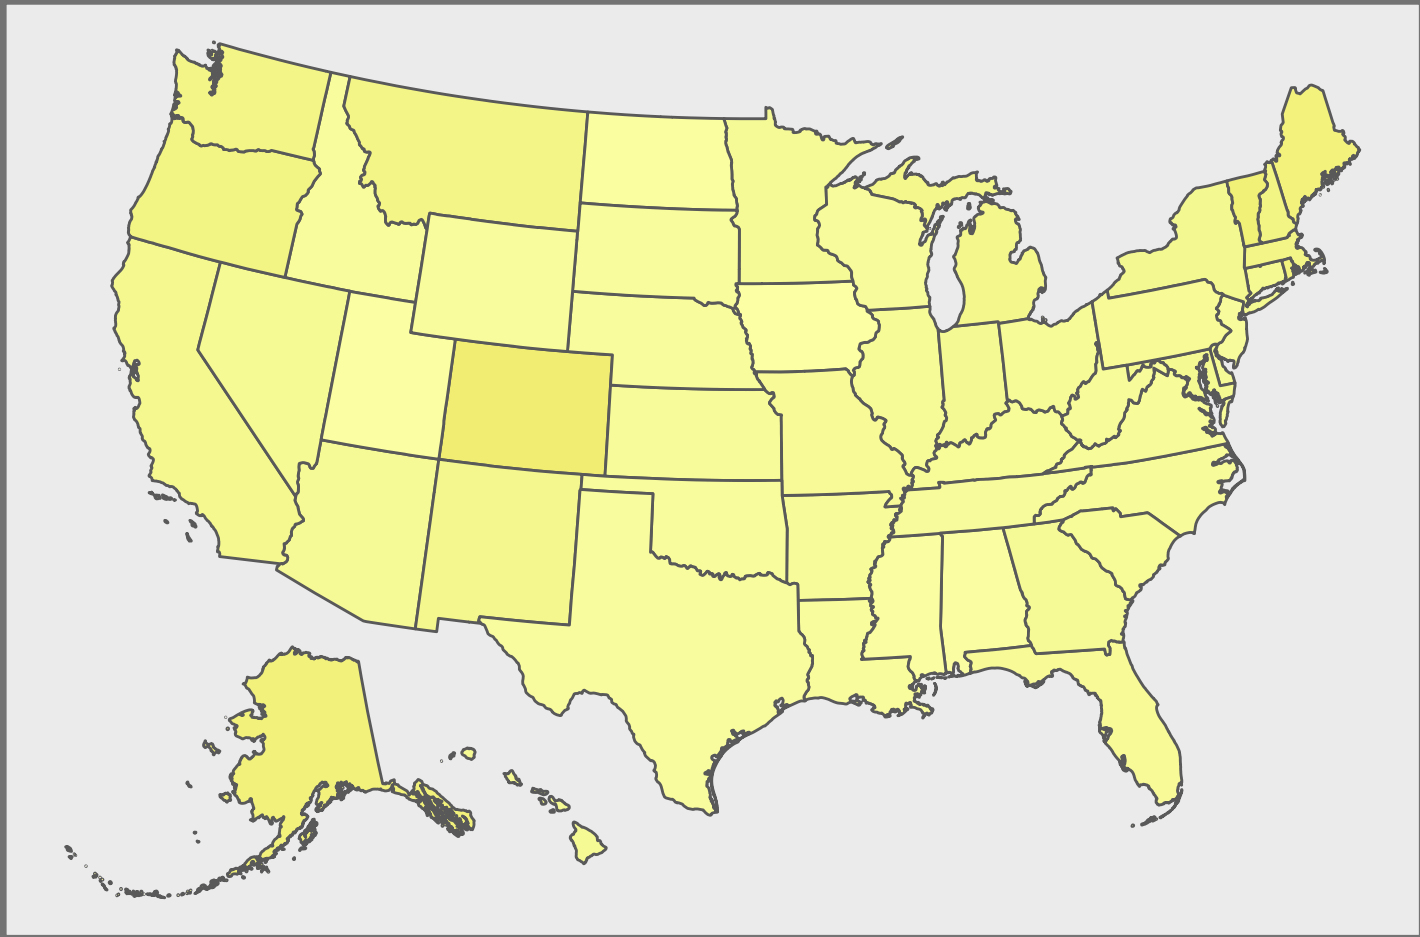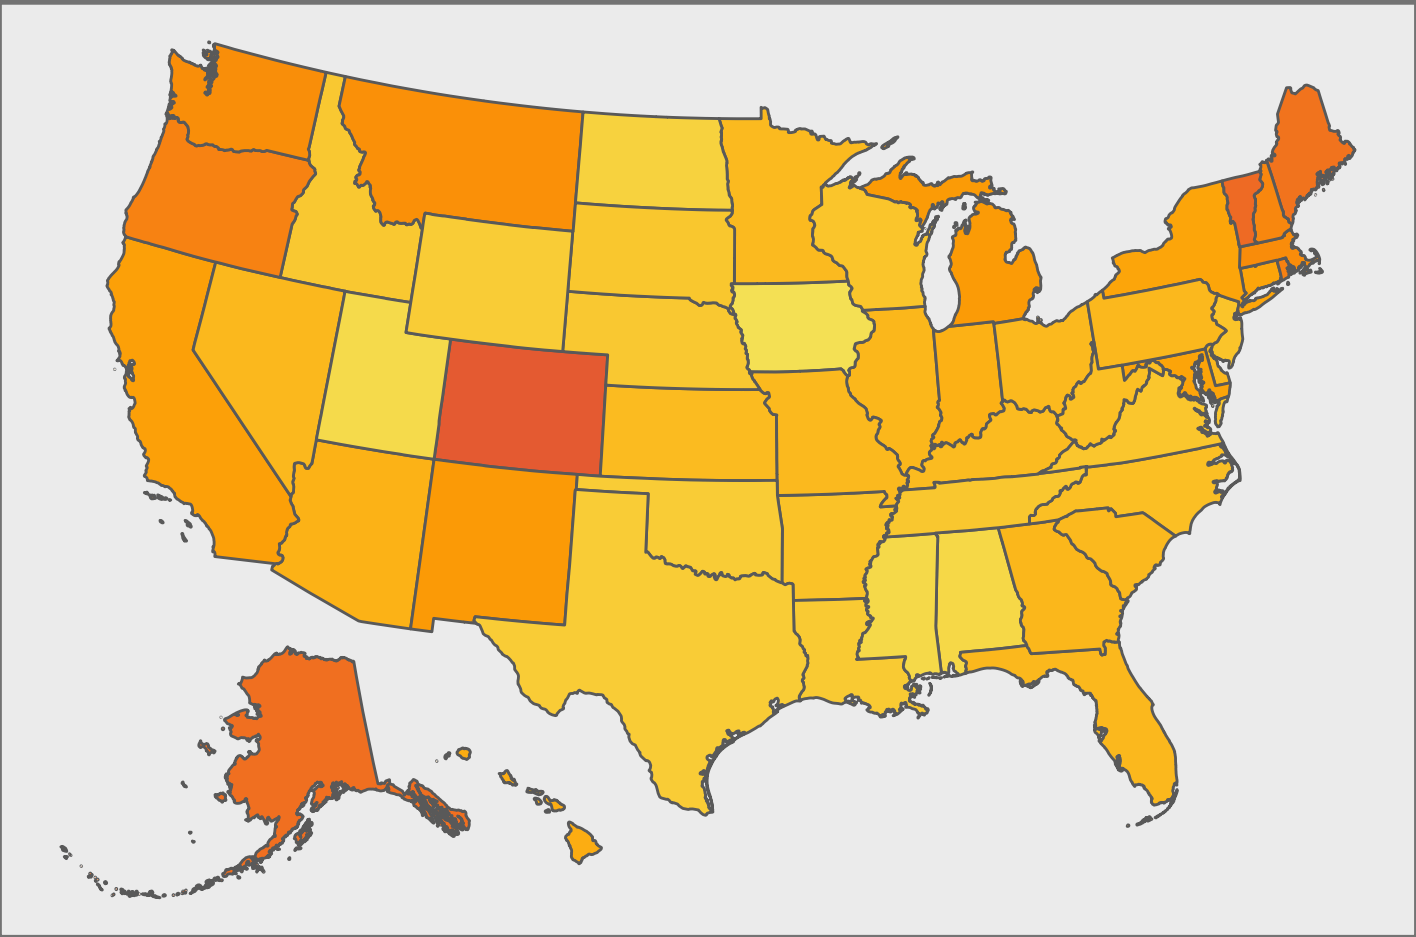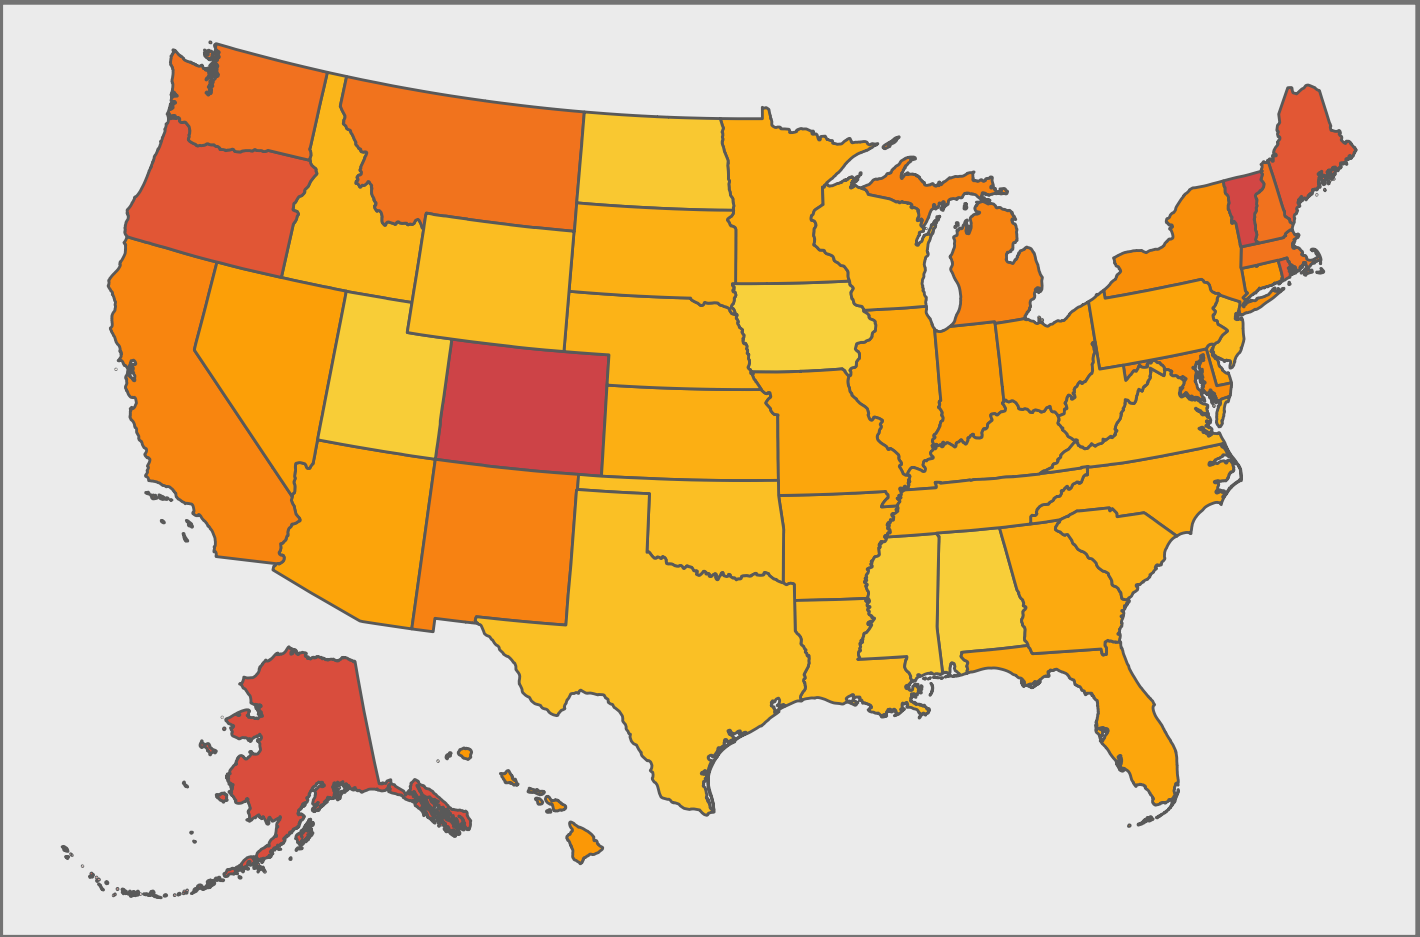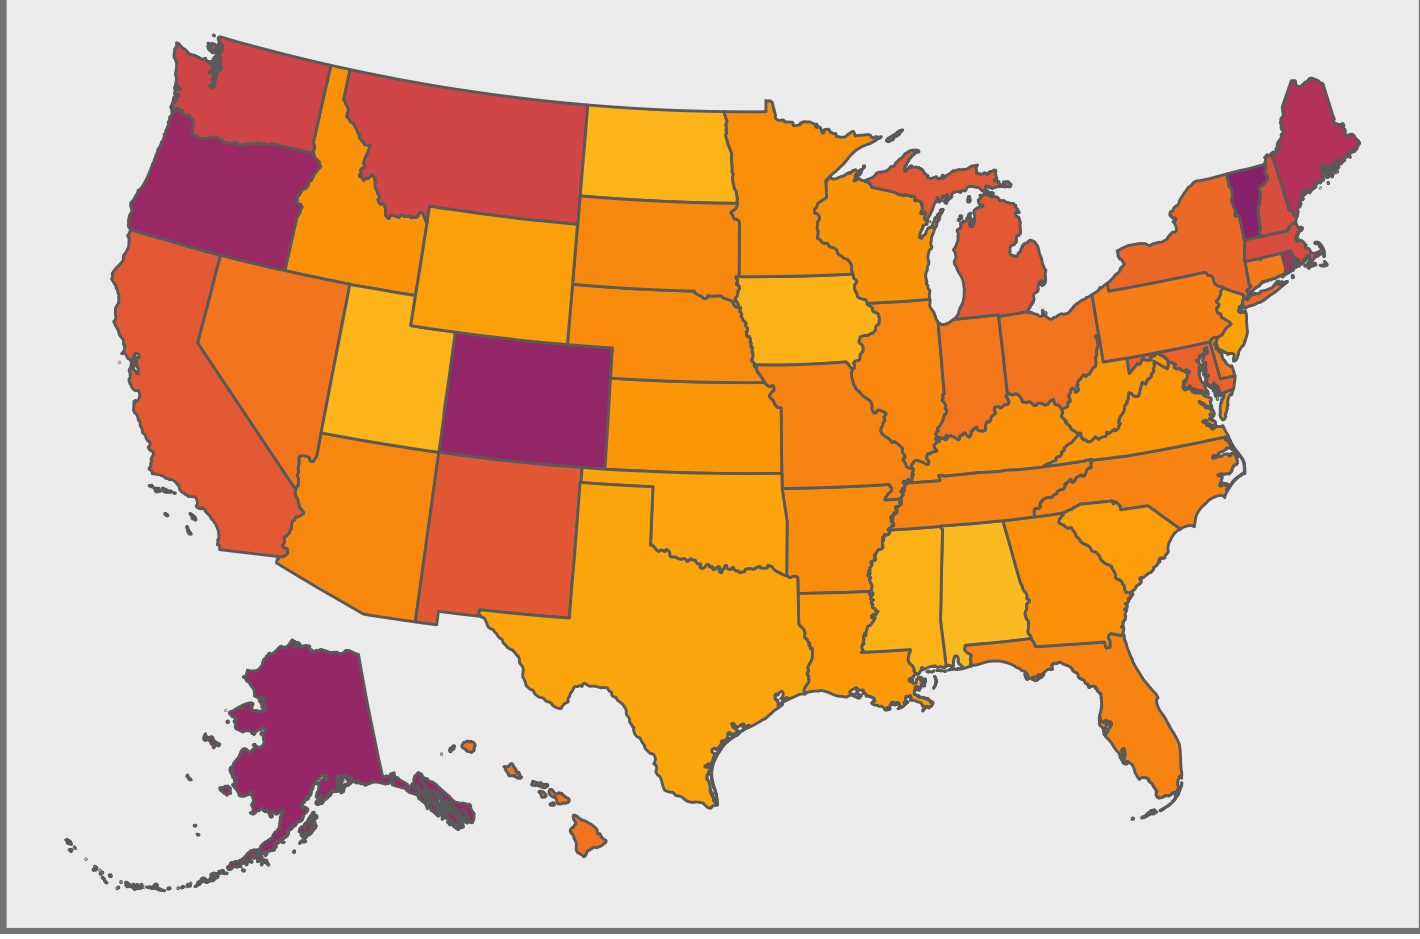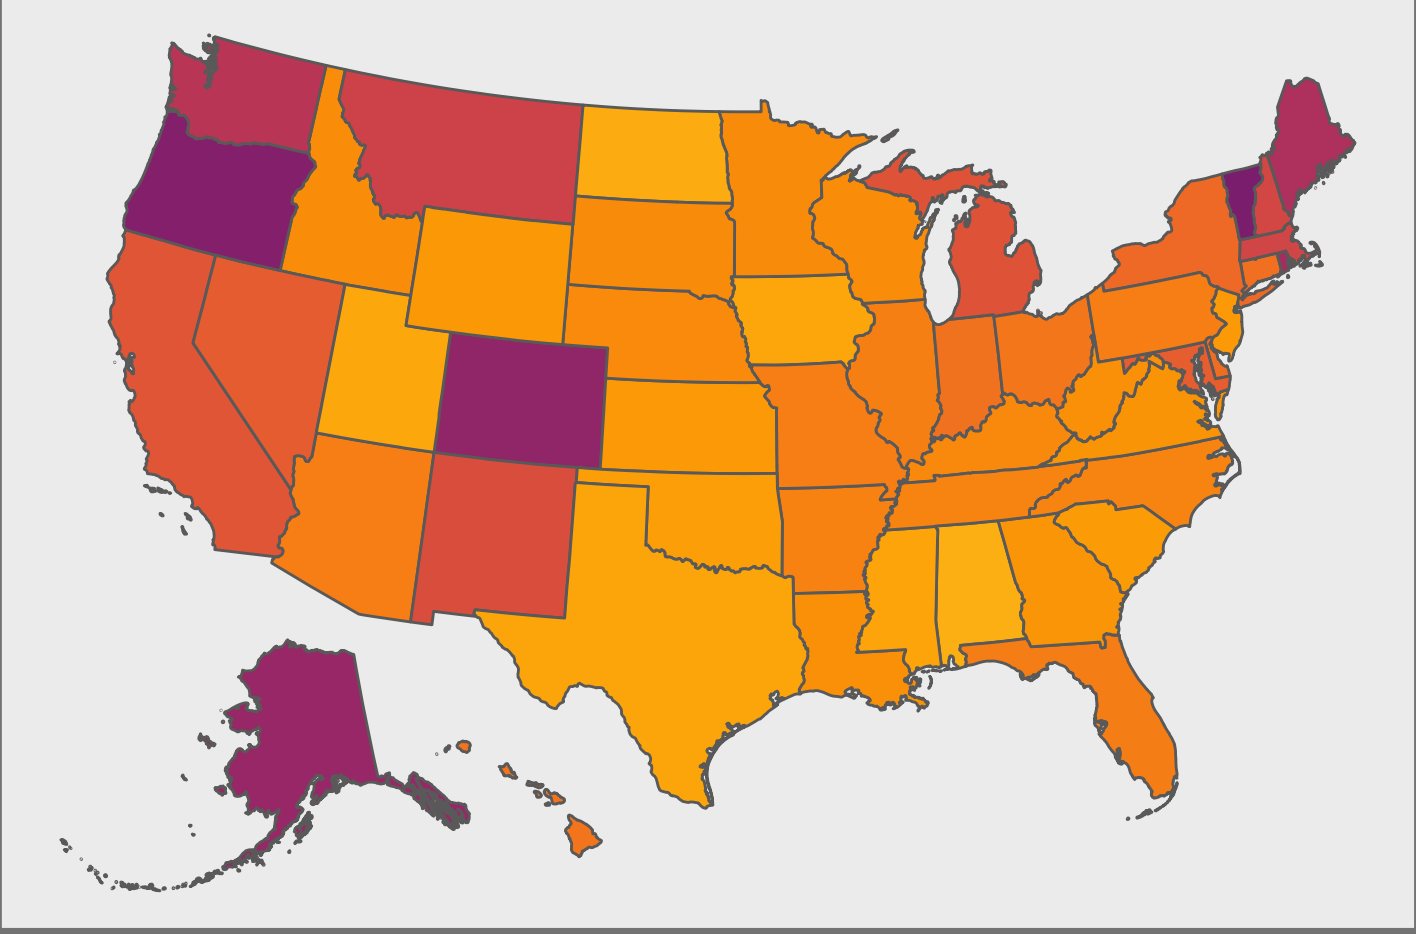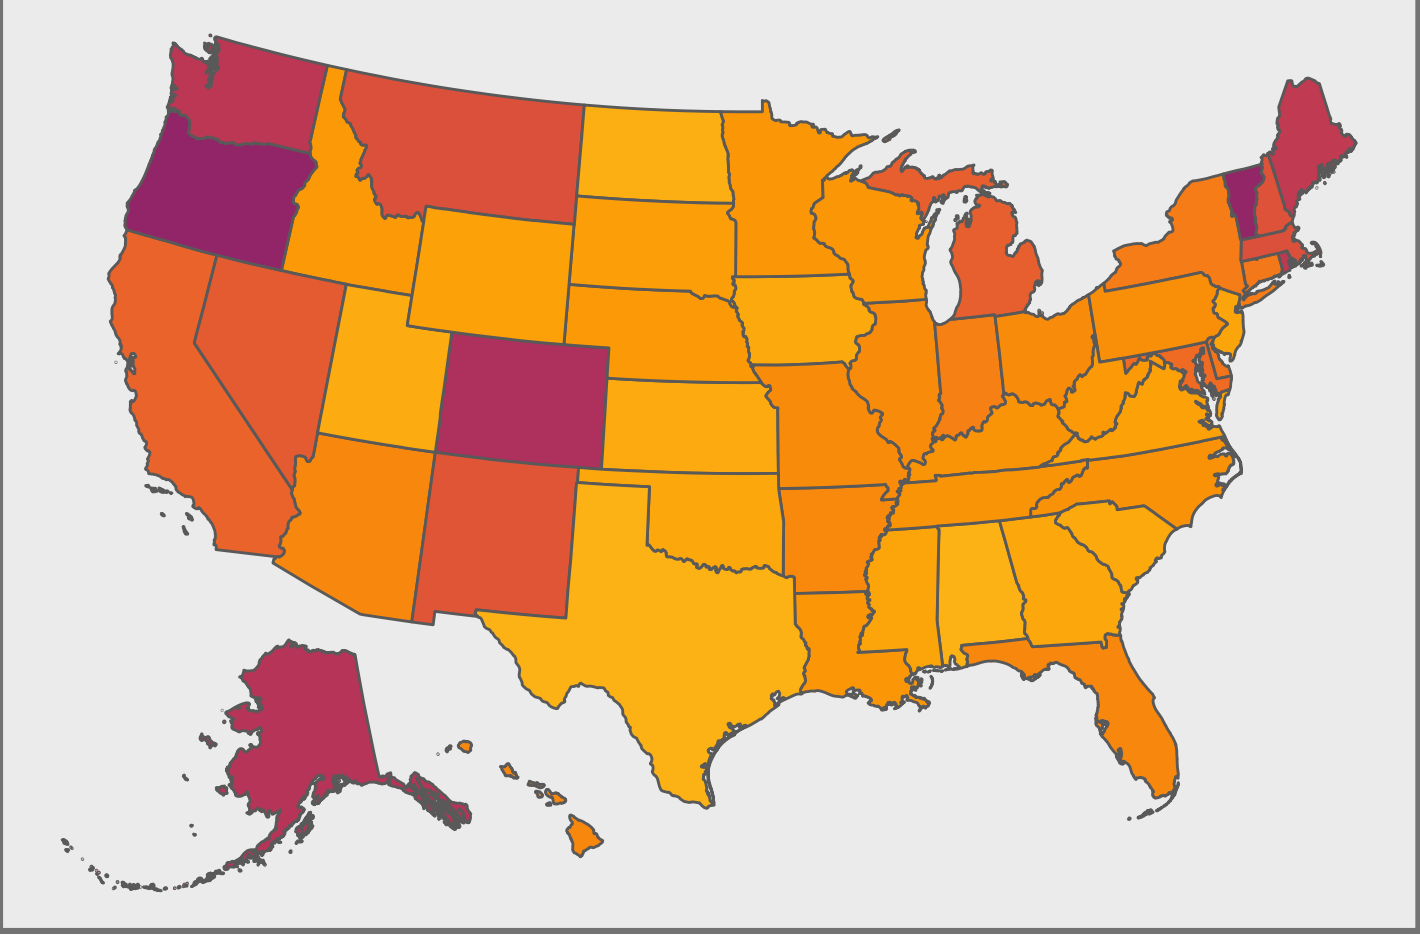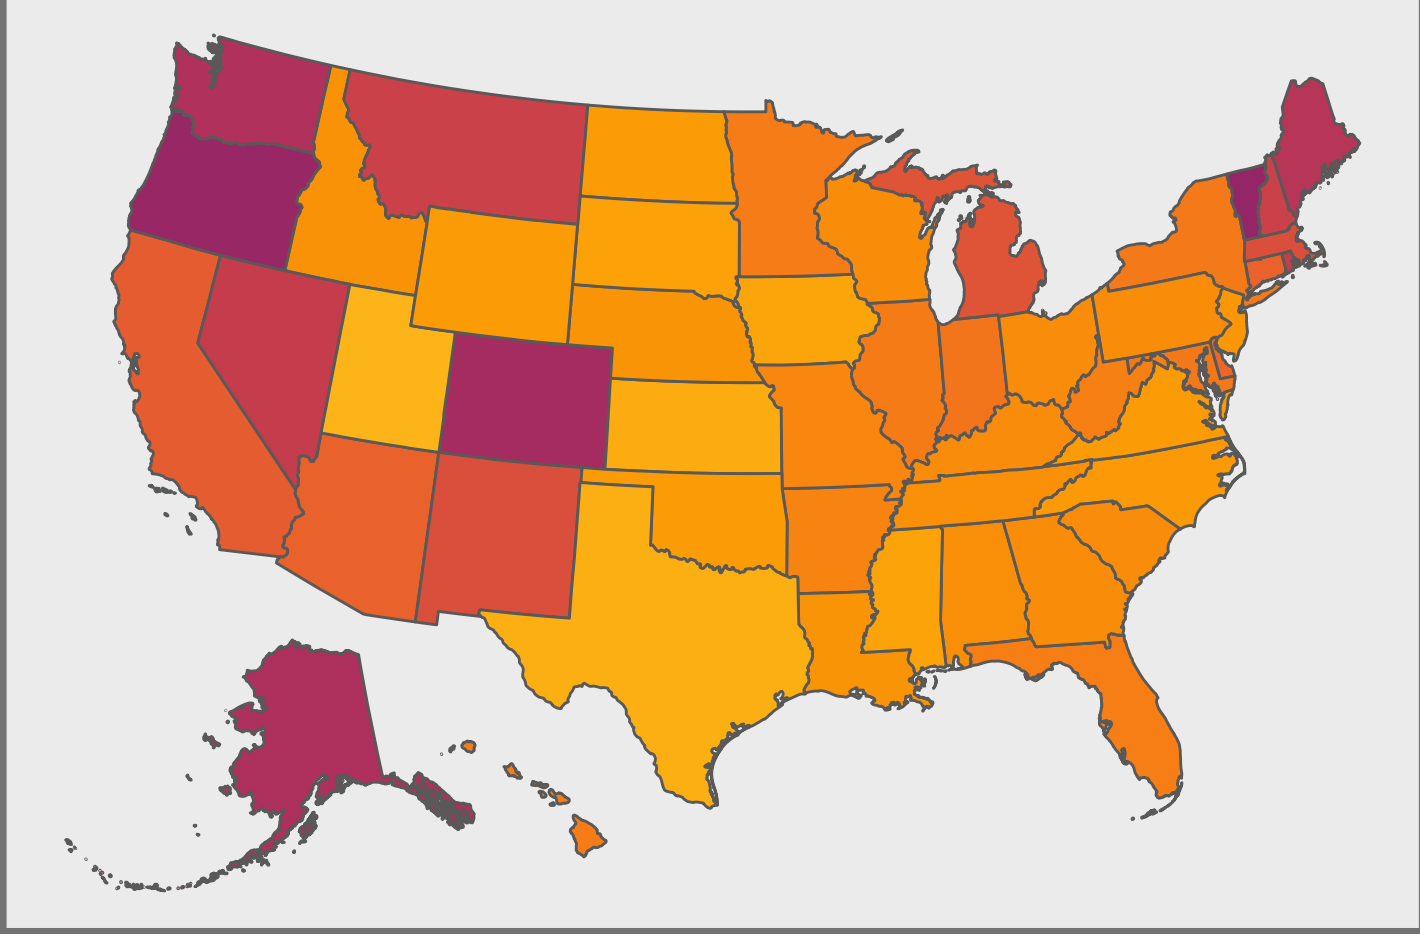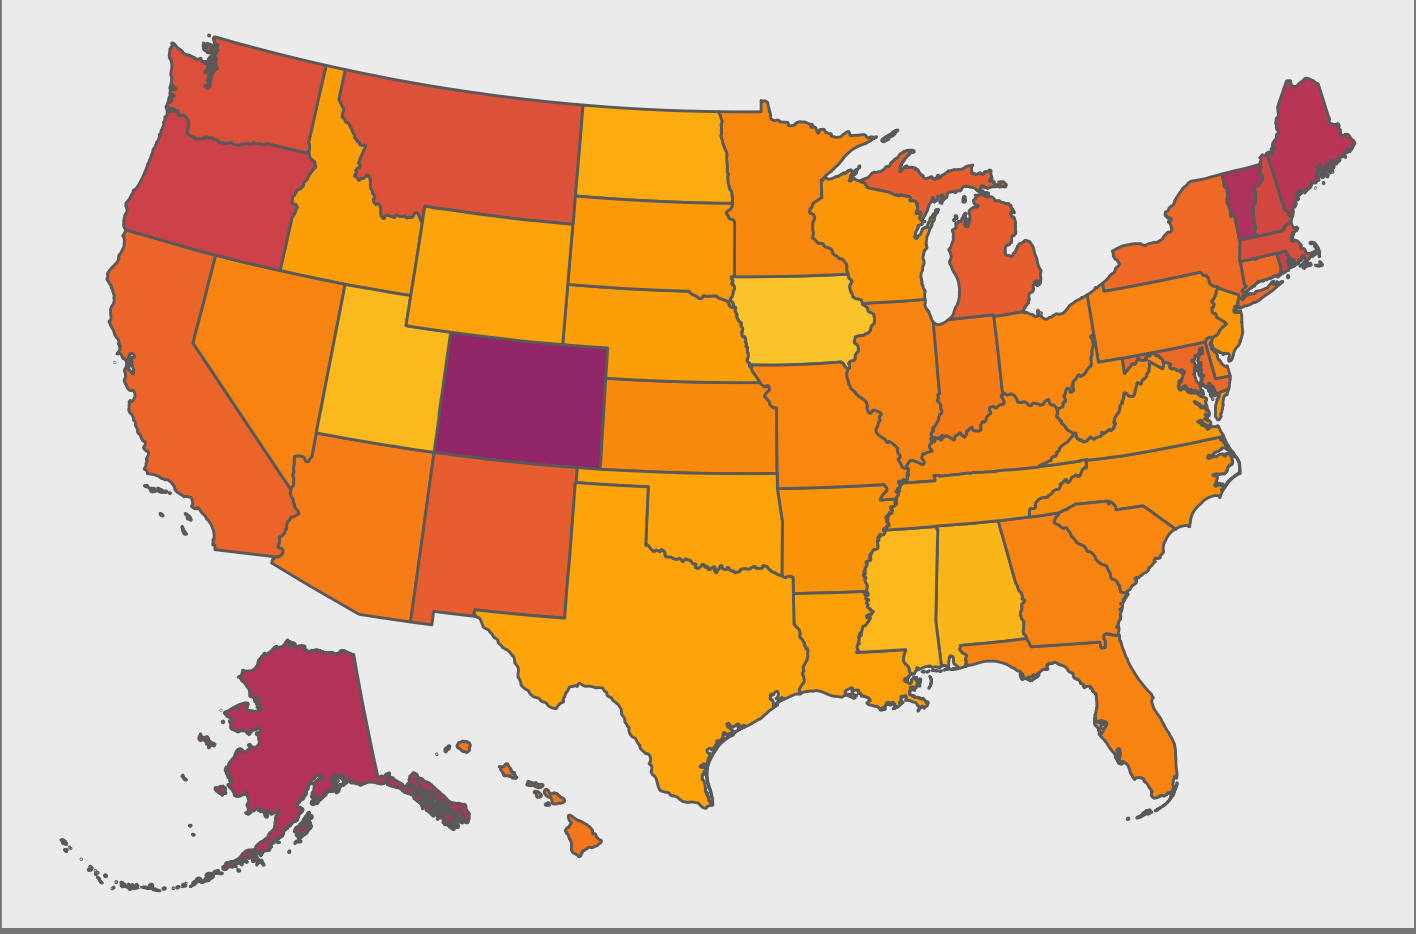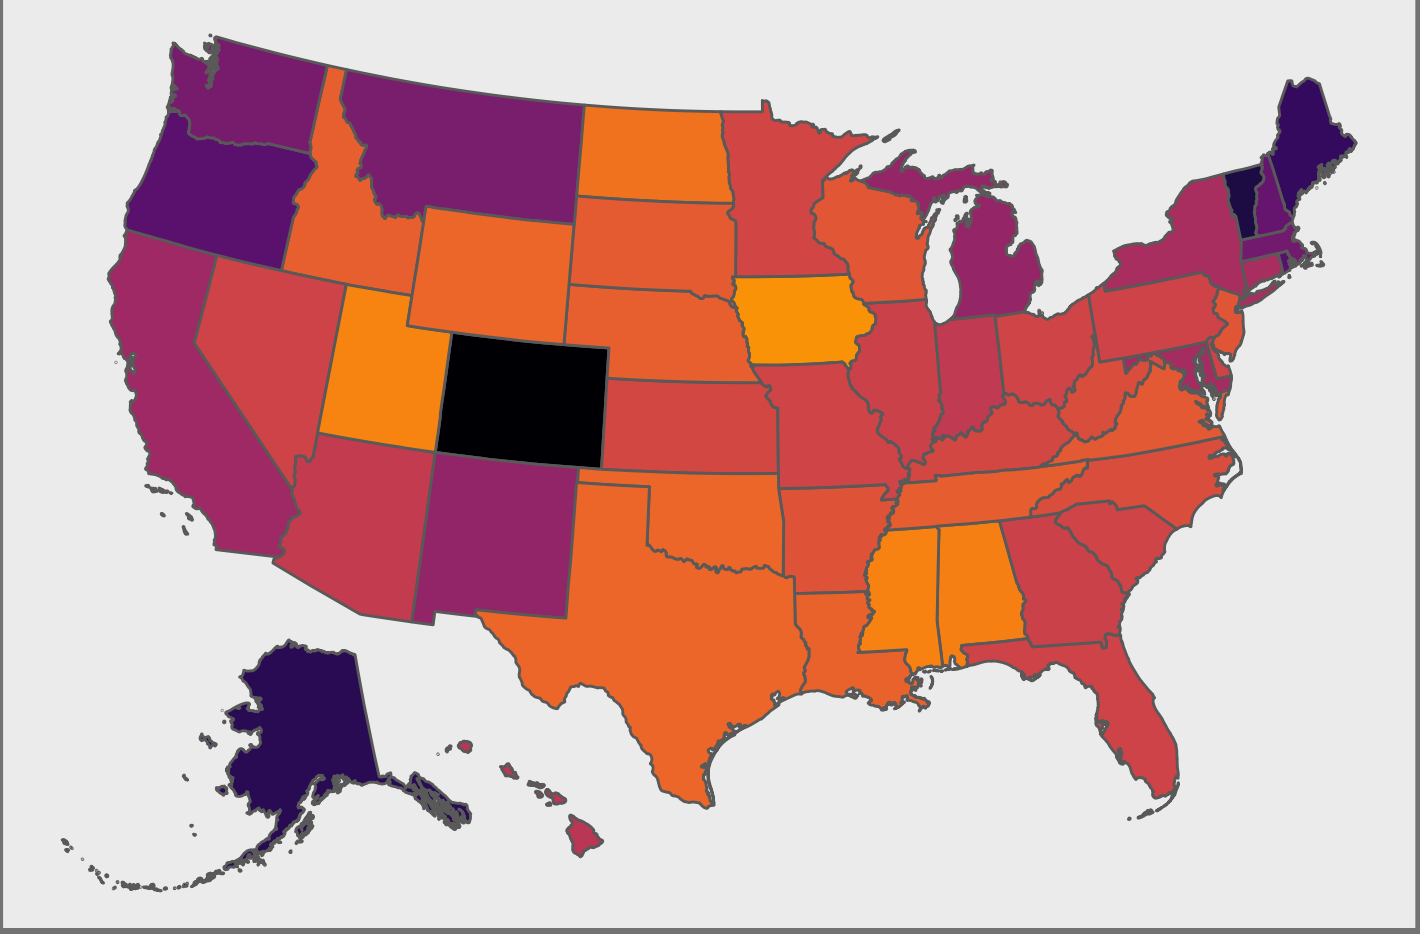

0.010



Cancer Rate as a Function of Tobacco Exposure

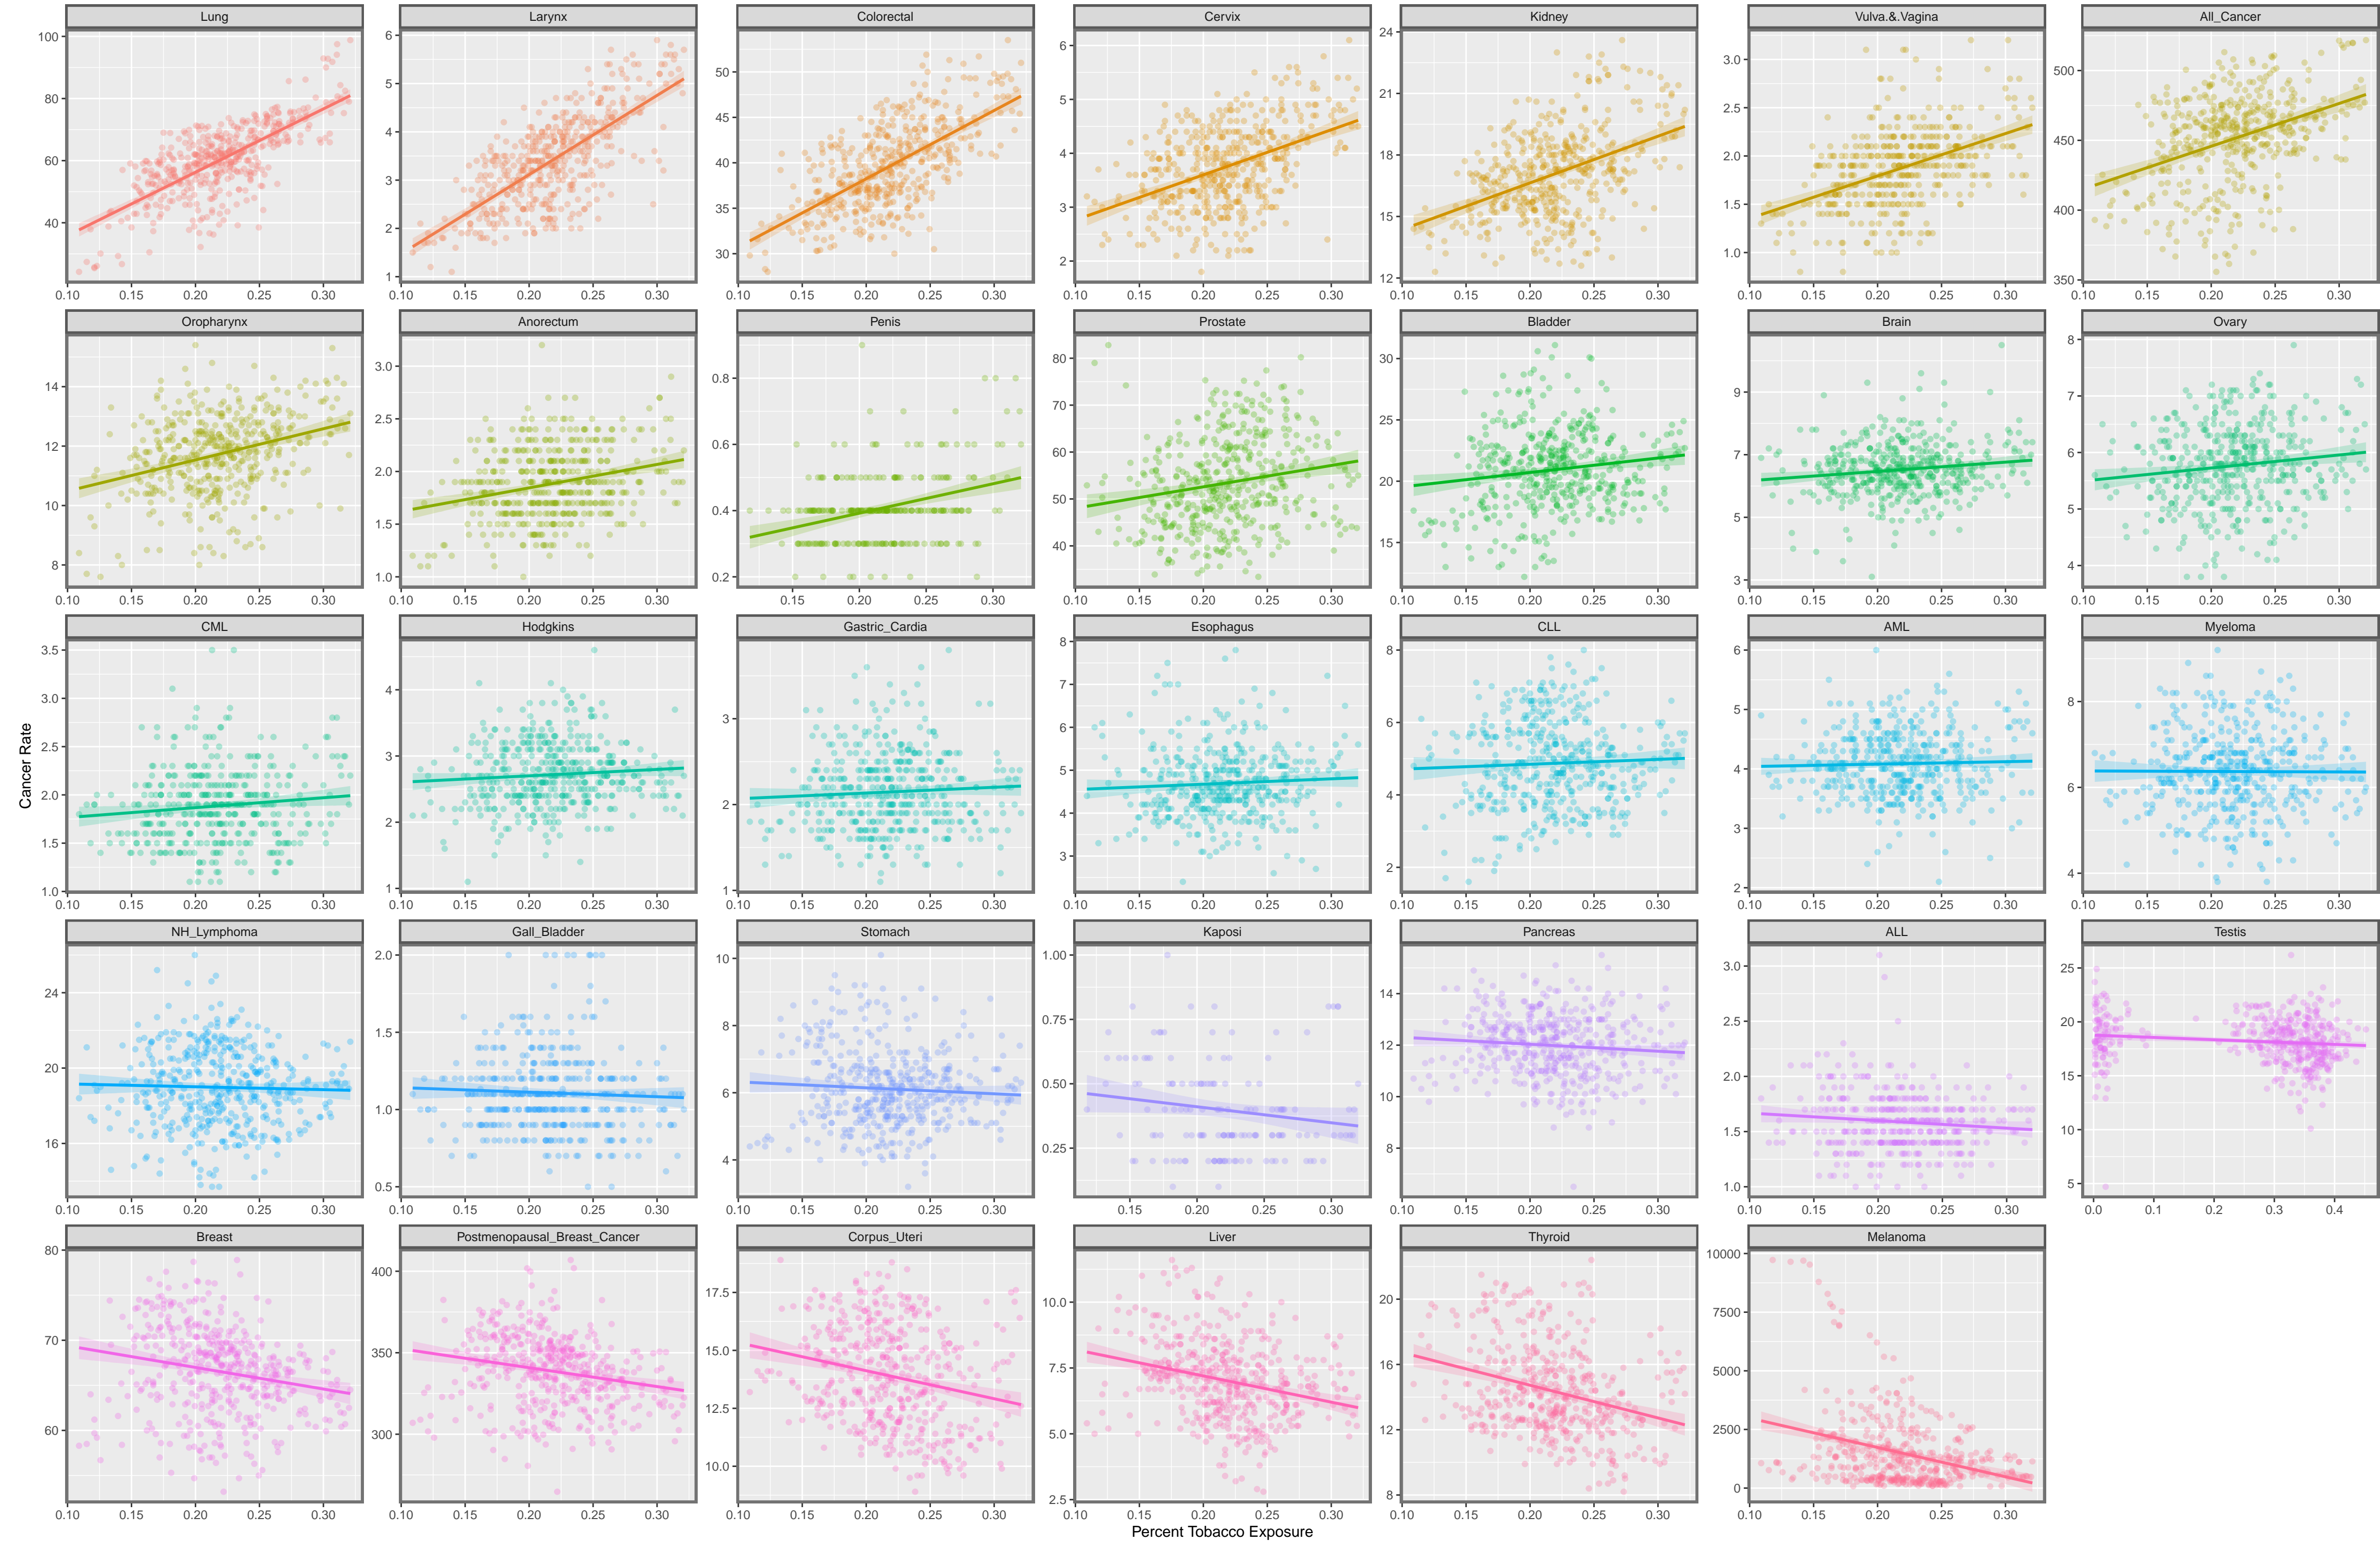



Cancer Rate as a Function of Alcohol Exposure

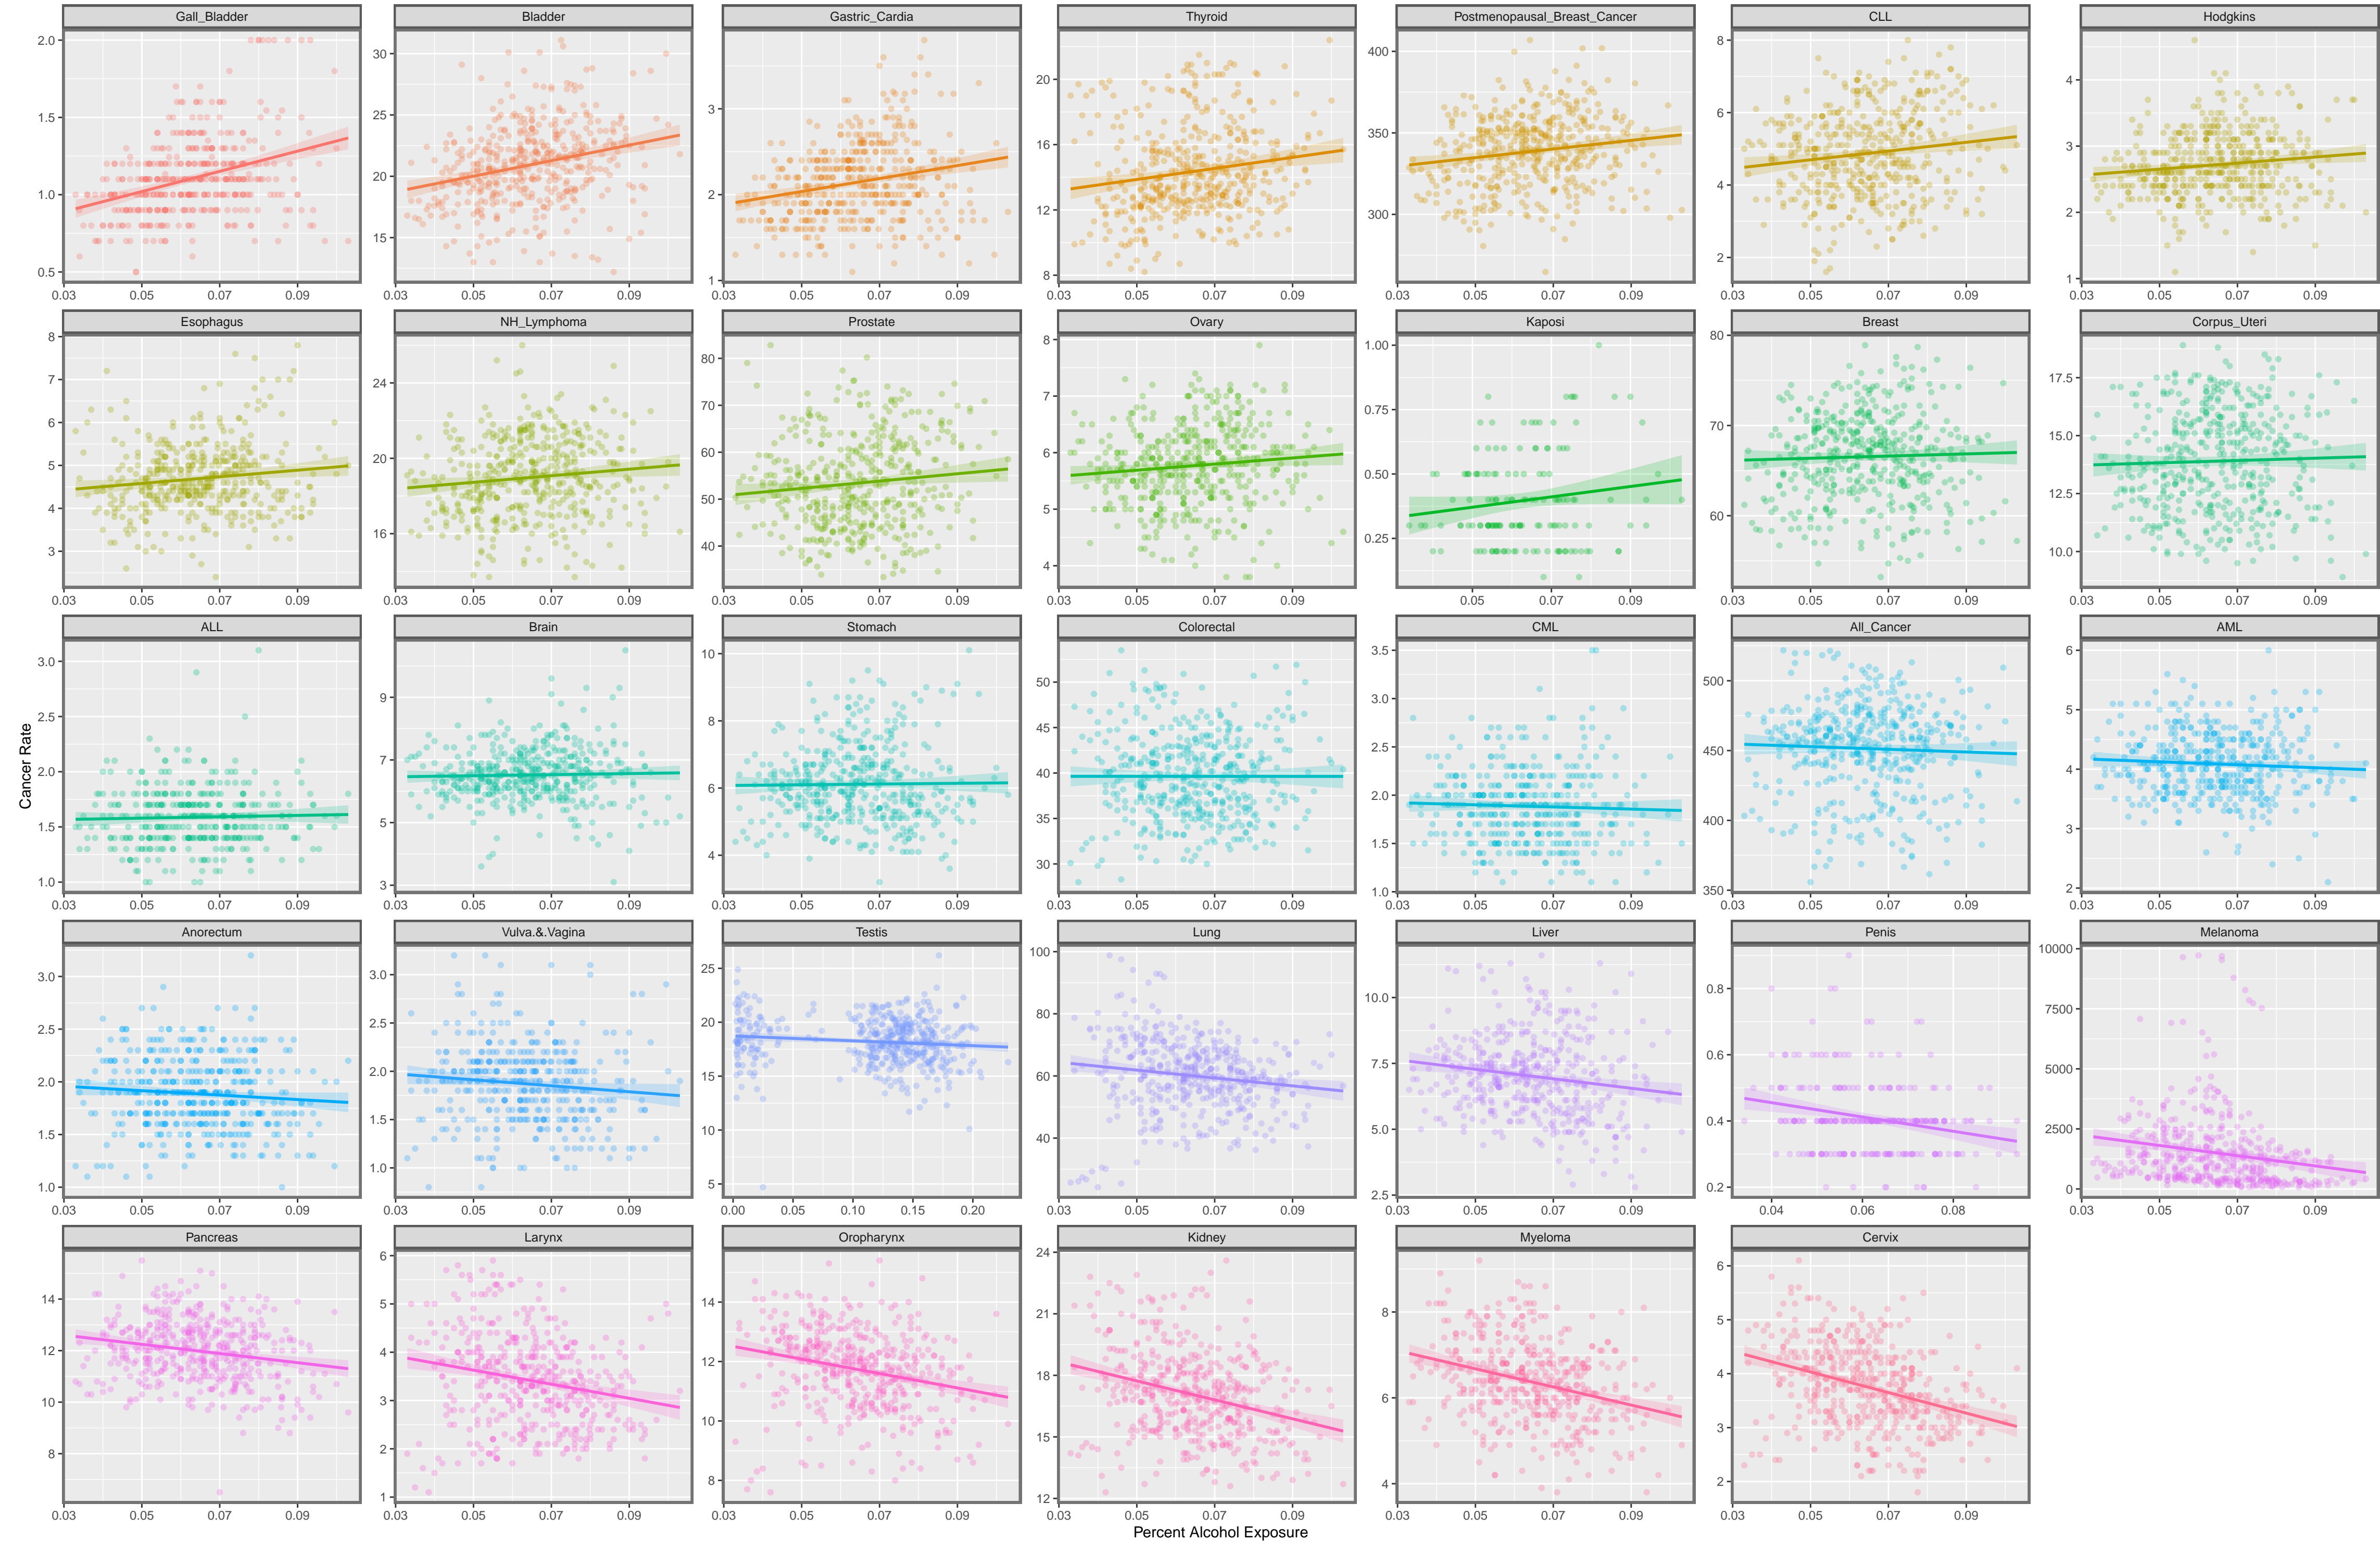



Cancer Rate as a Function of ..9THC Exposure

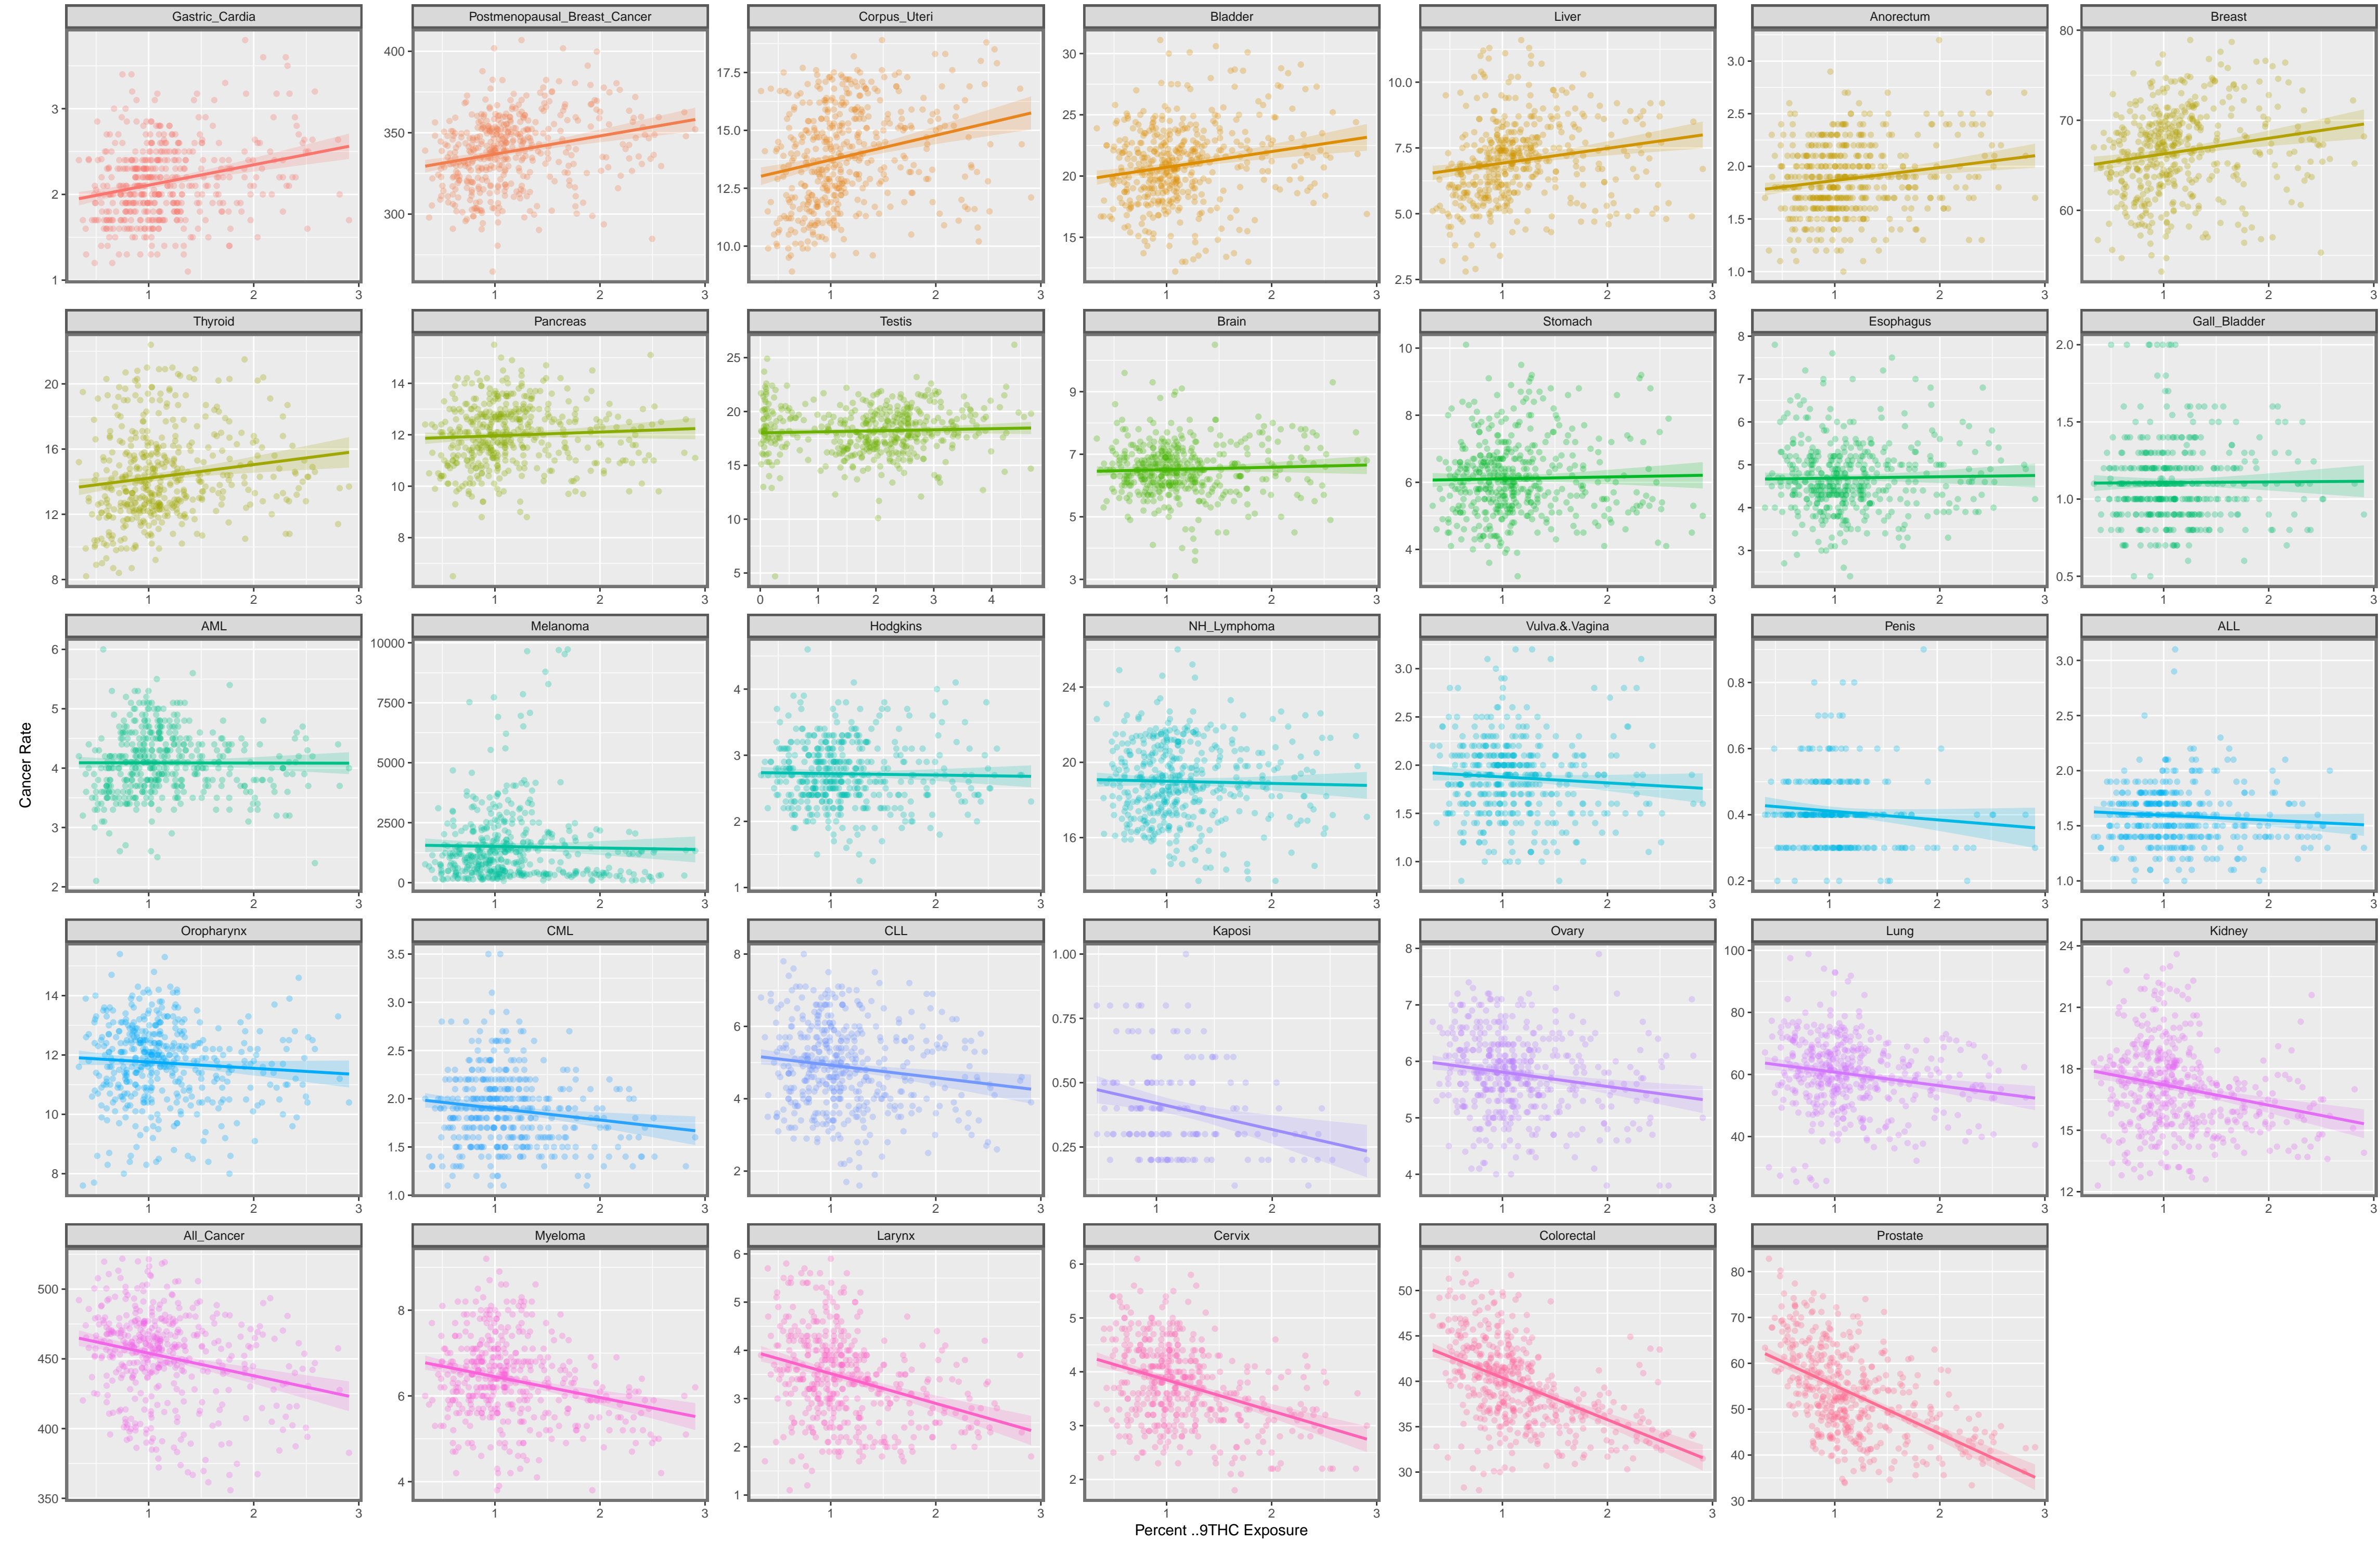

Cancer Rate as a Function of Tobacco Exposure Quintile  
for Highest v. Lowest Quintiles

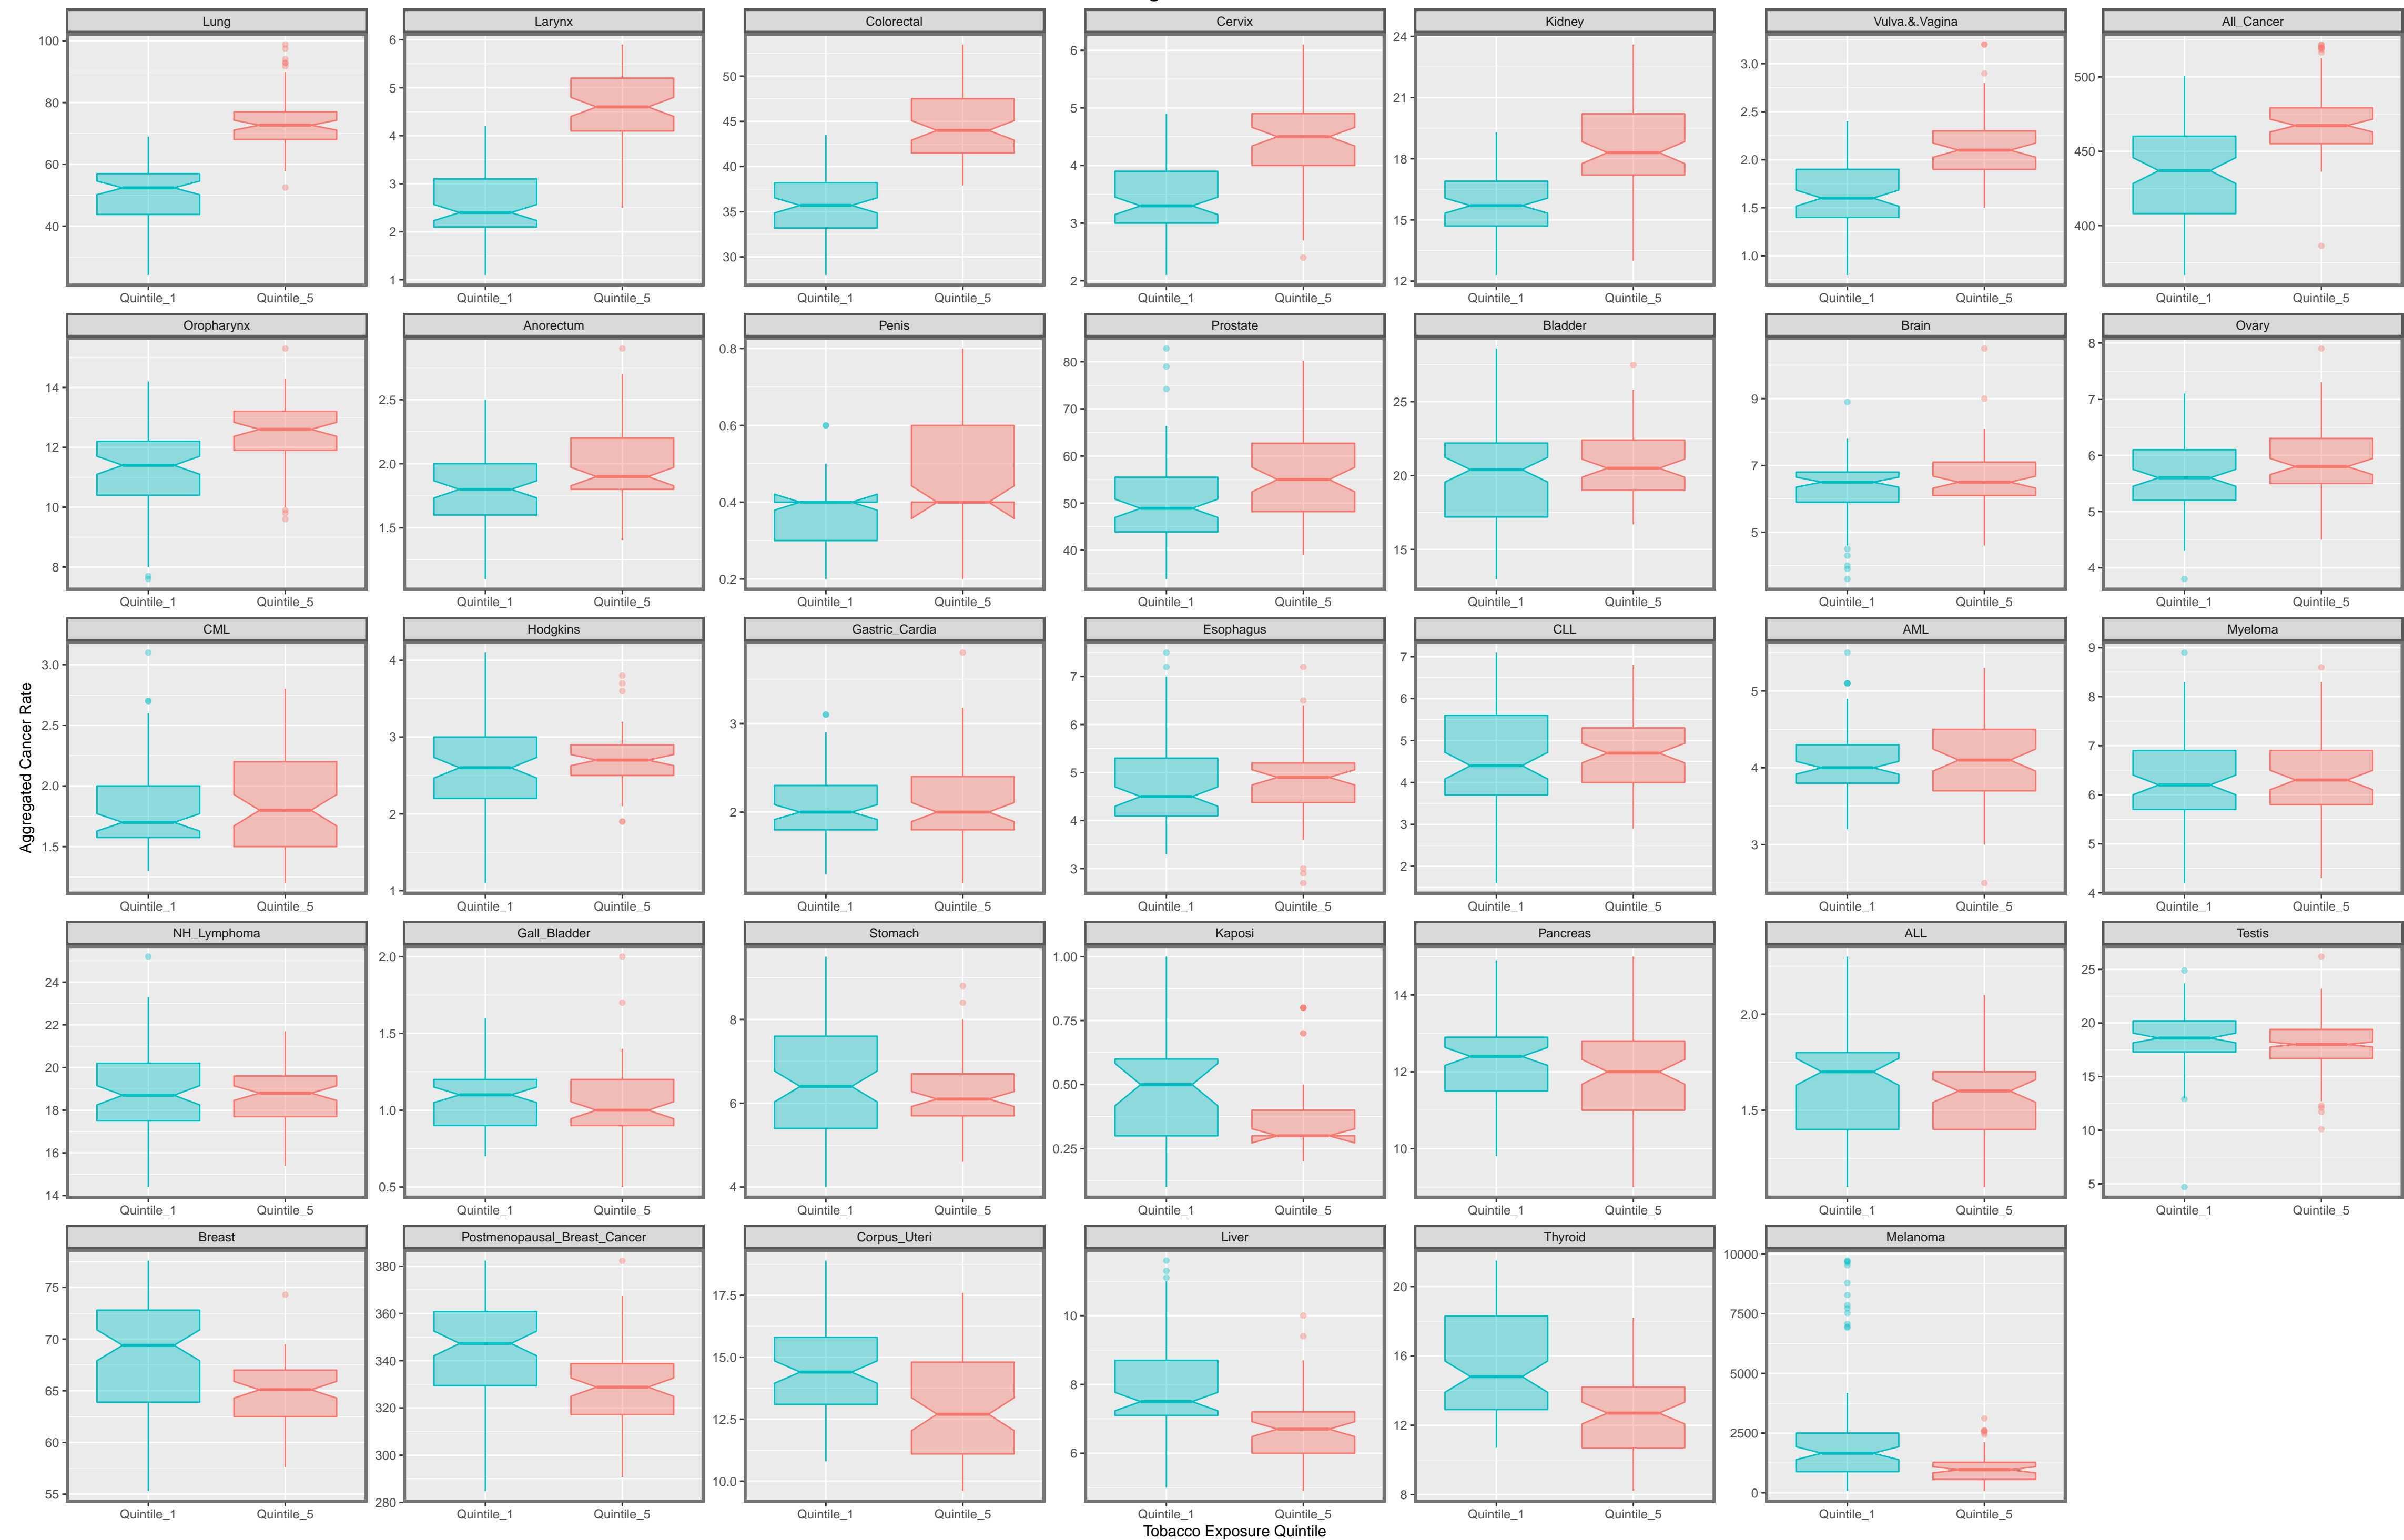

Cancer Rate as a Function of Alcohol Exposure Quintile  
for Highest v. Lowest Quintiles

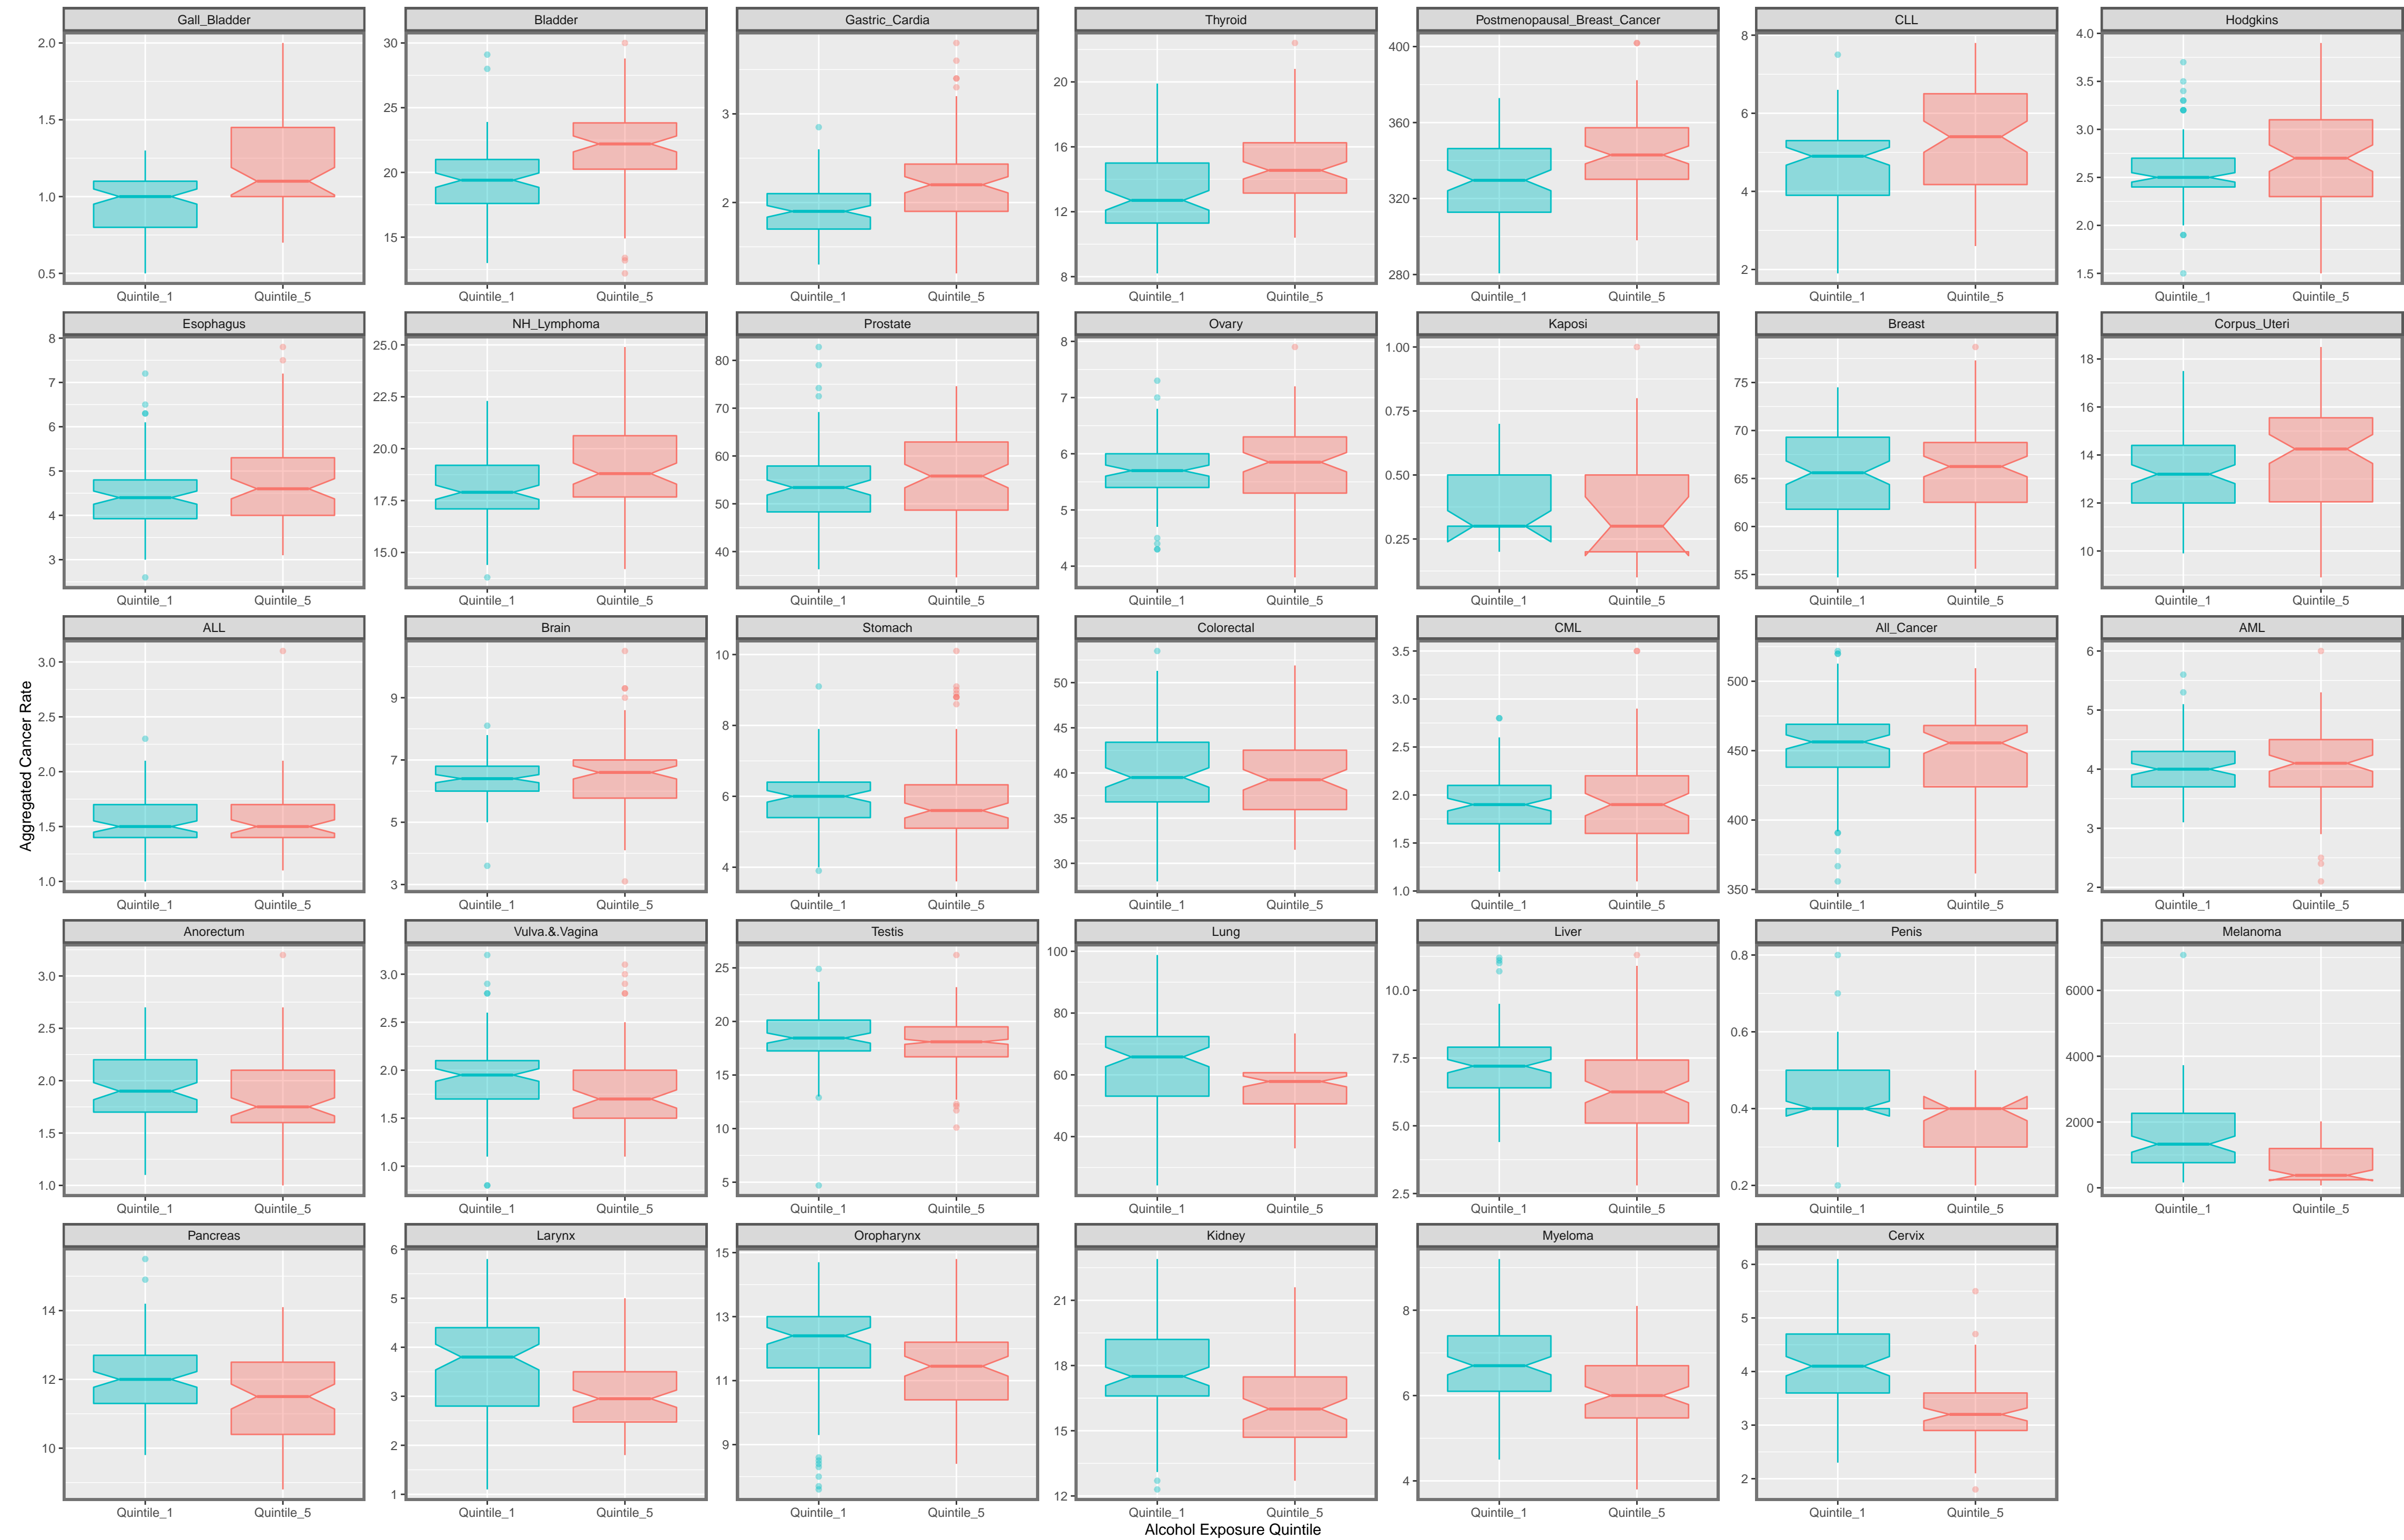



Cancer Rate as a Function of ..8THC Exposure Quintile  
for Highest v. Lowest Quintiles

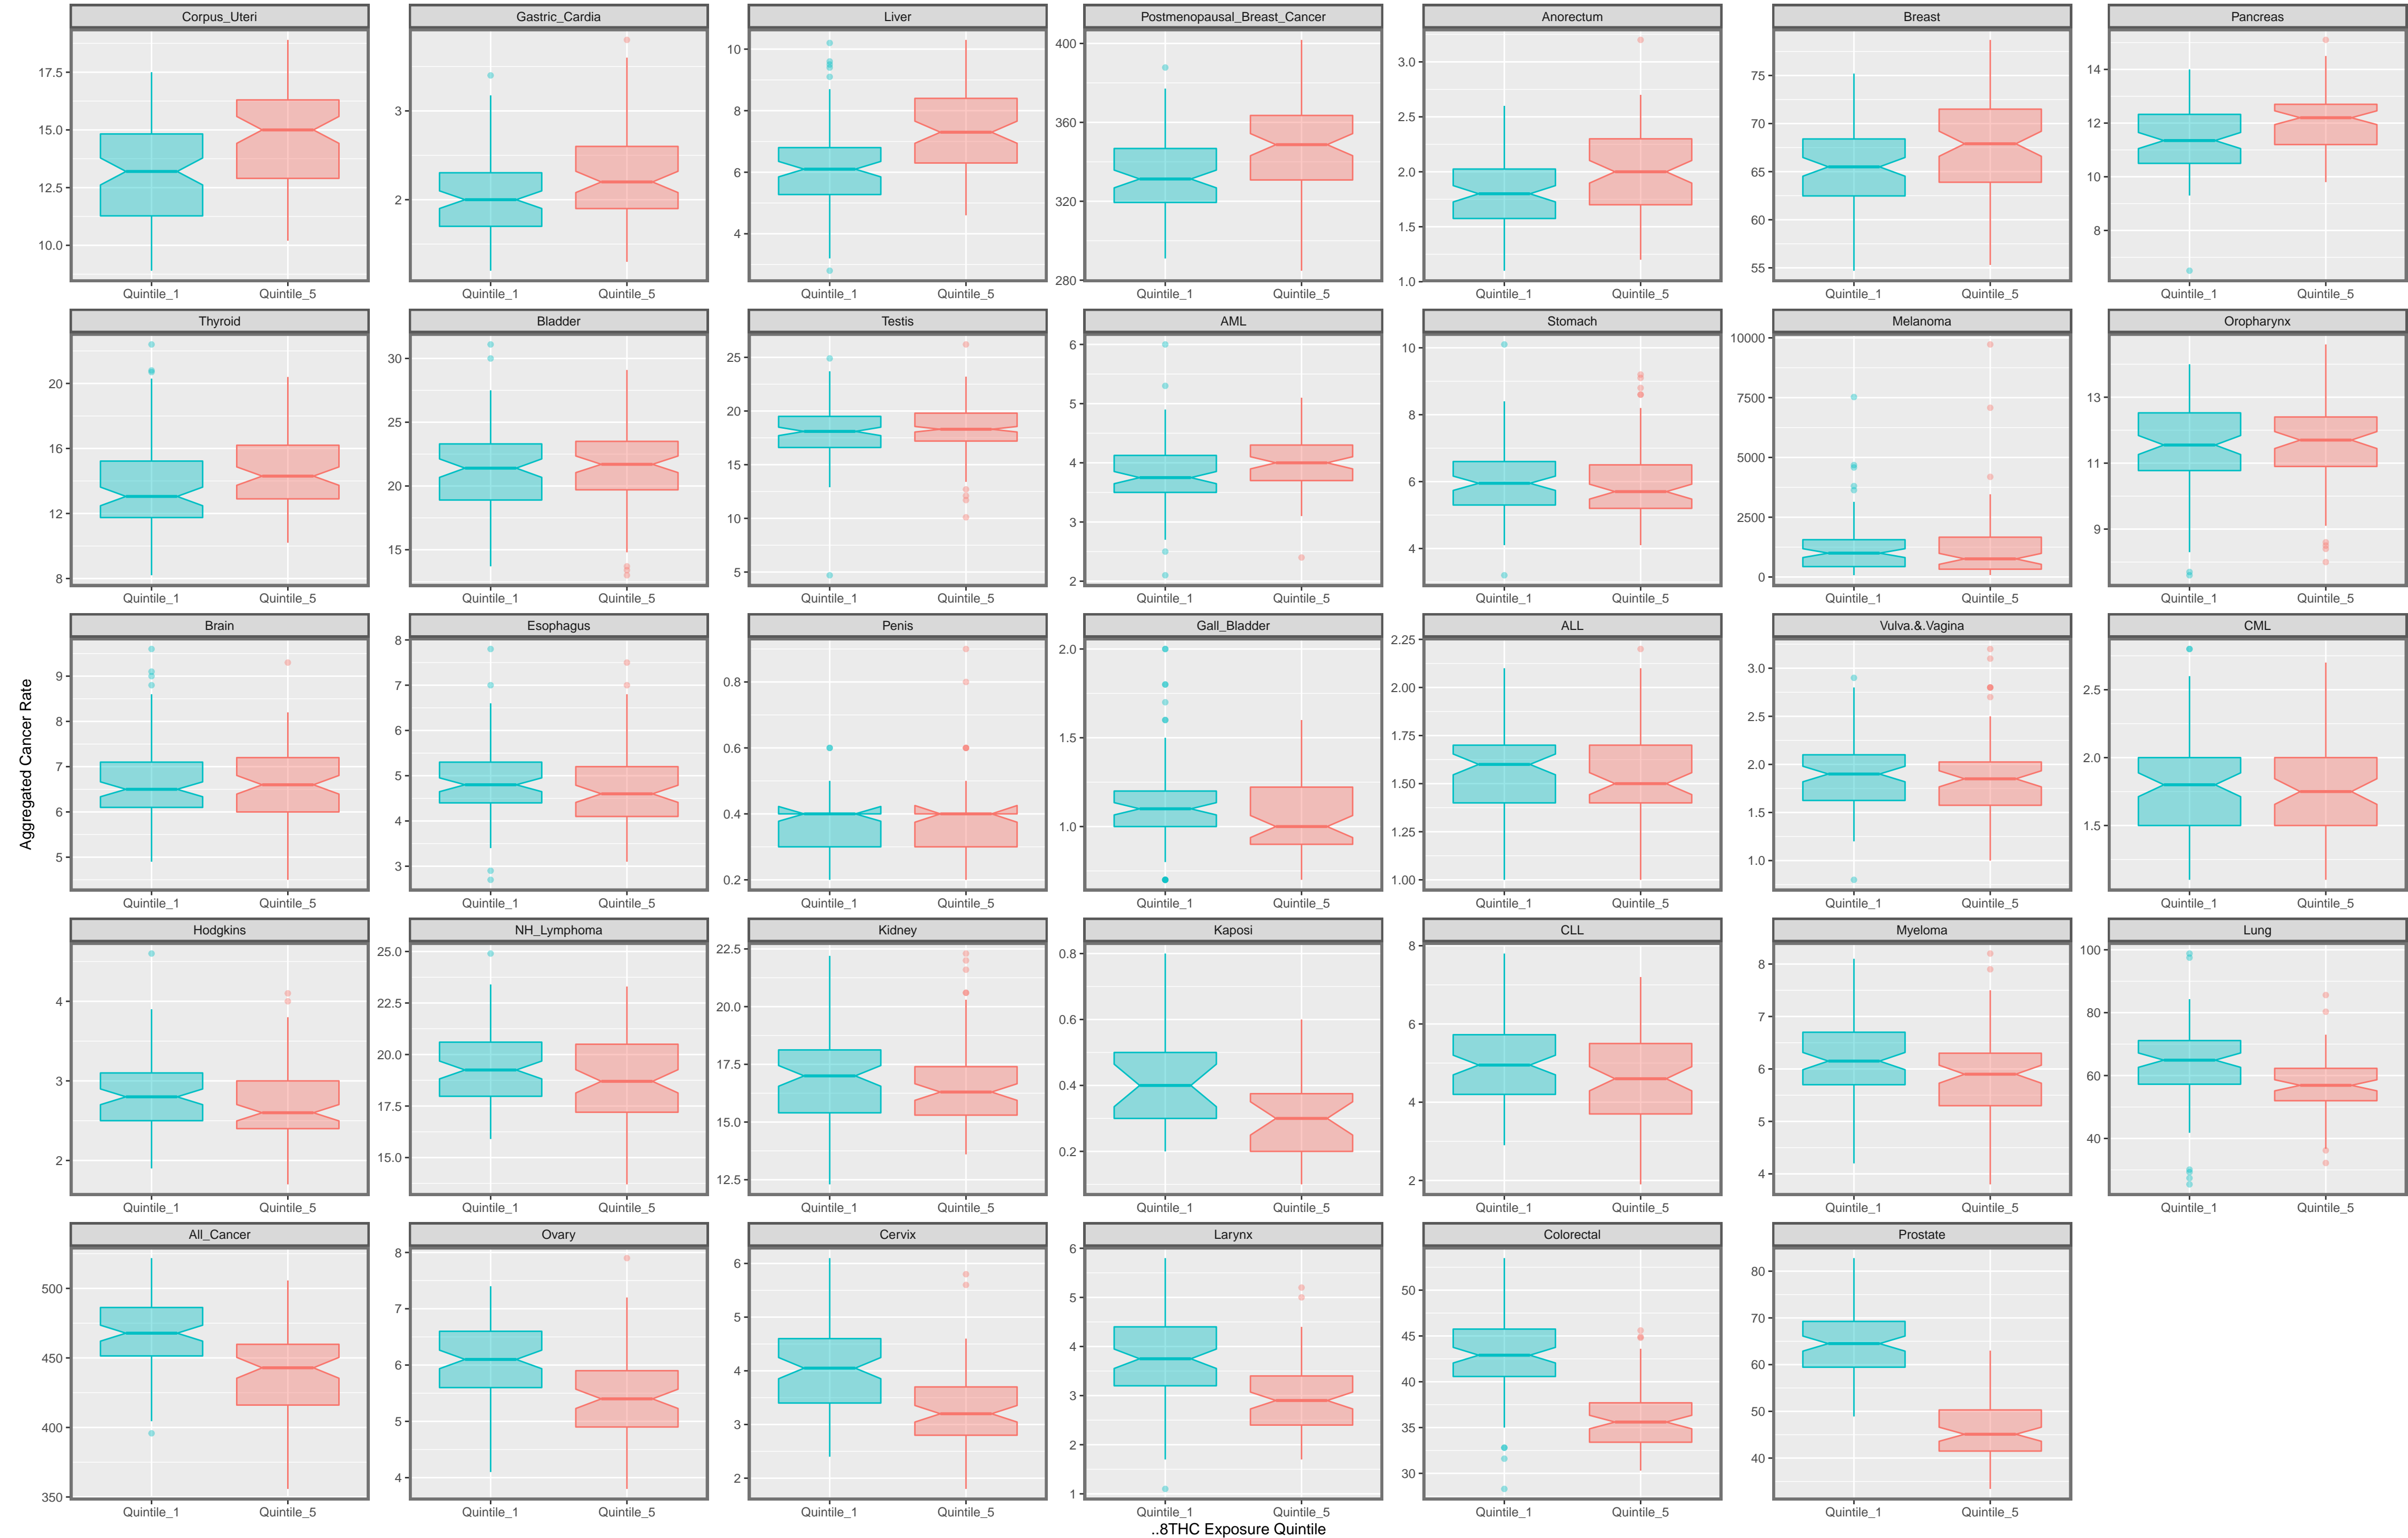



Cancer Rate as a Function of ..9THC Exposure Quintile  
for Quintile 4 v. Quintile 5

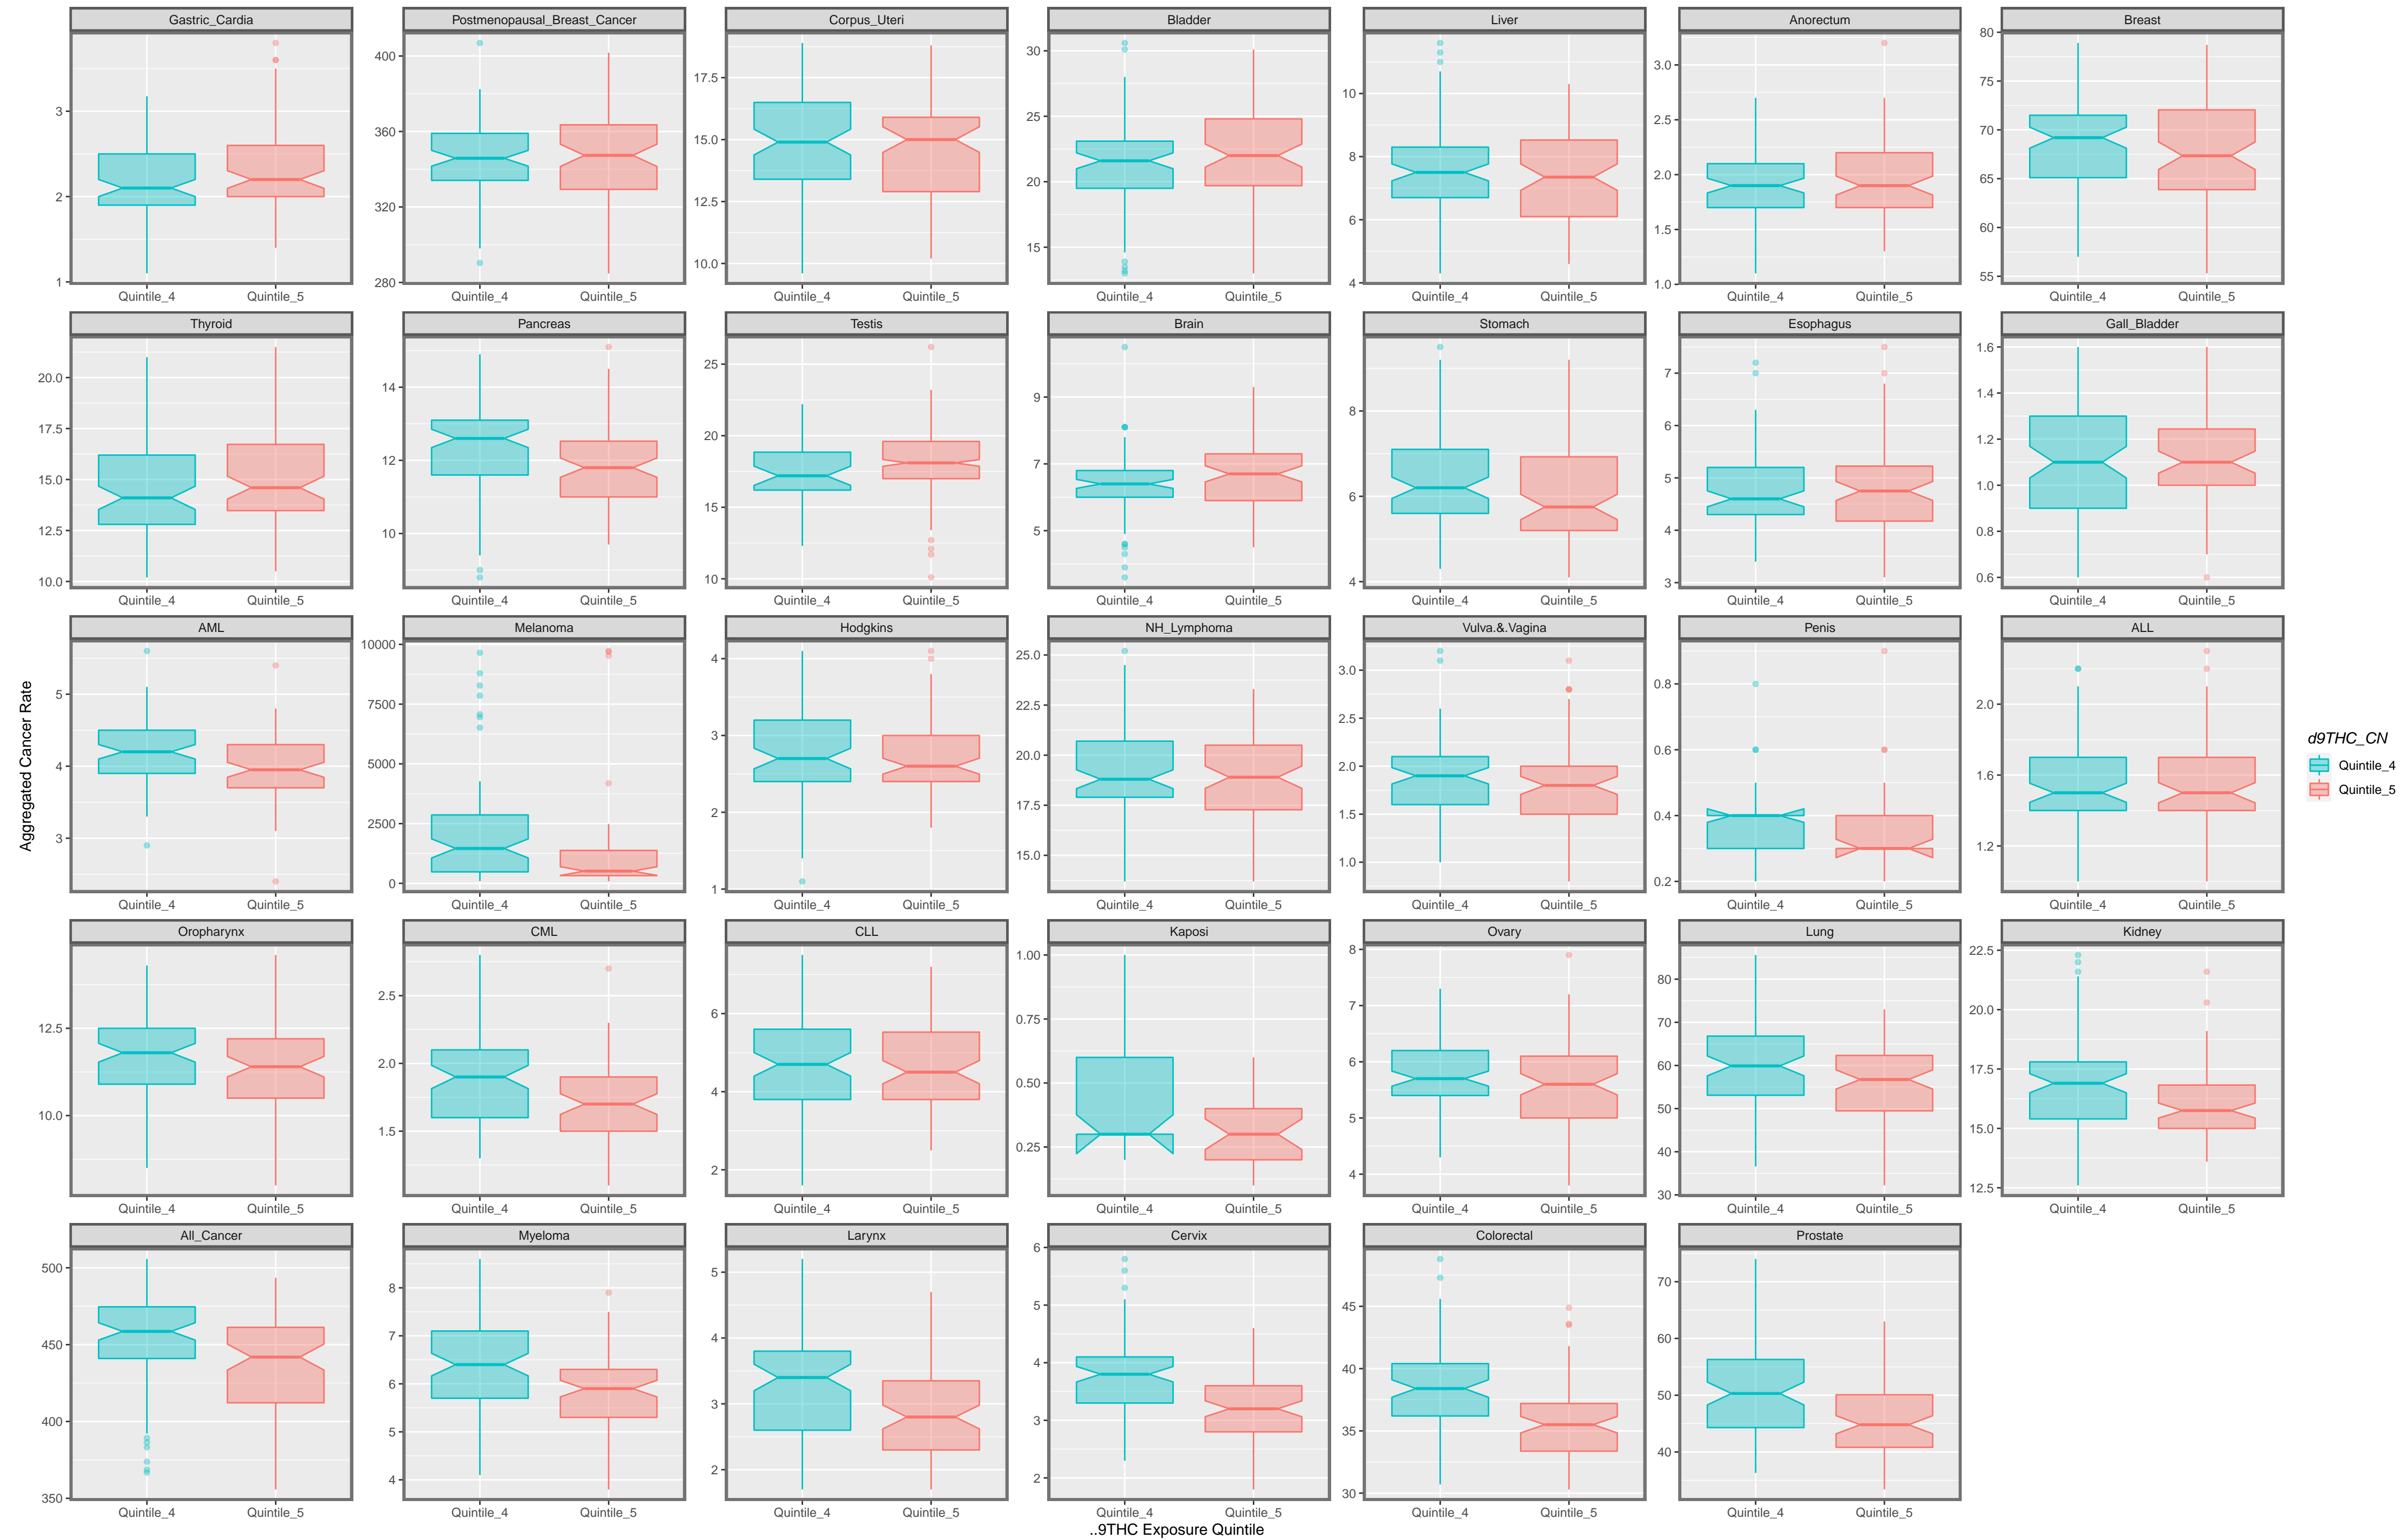

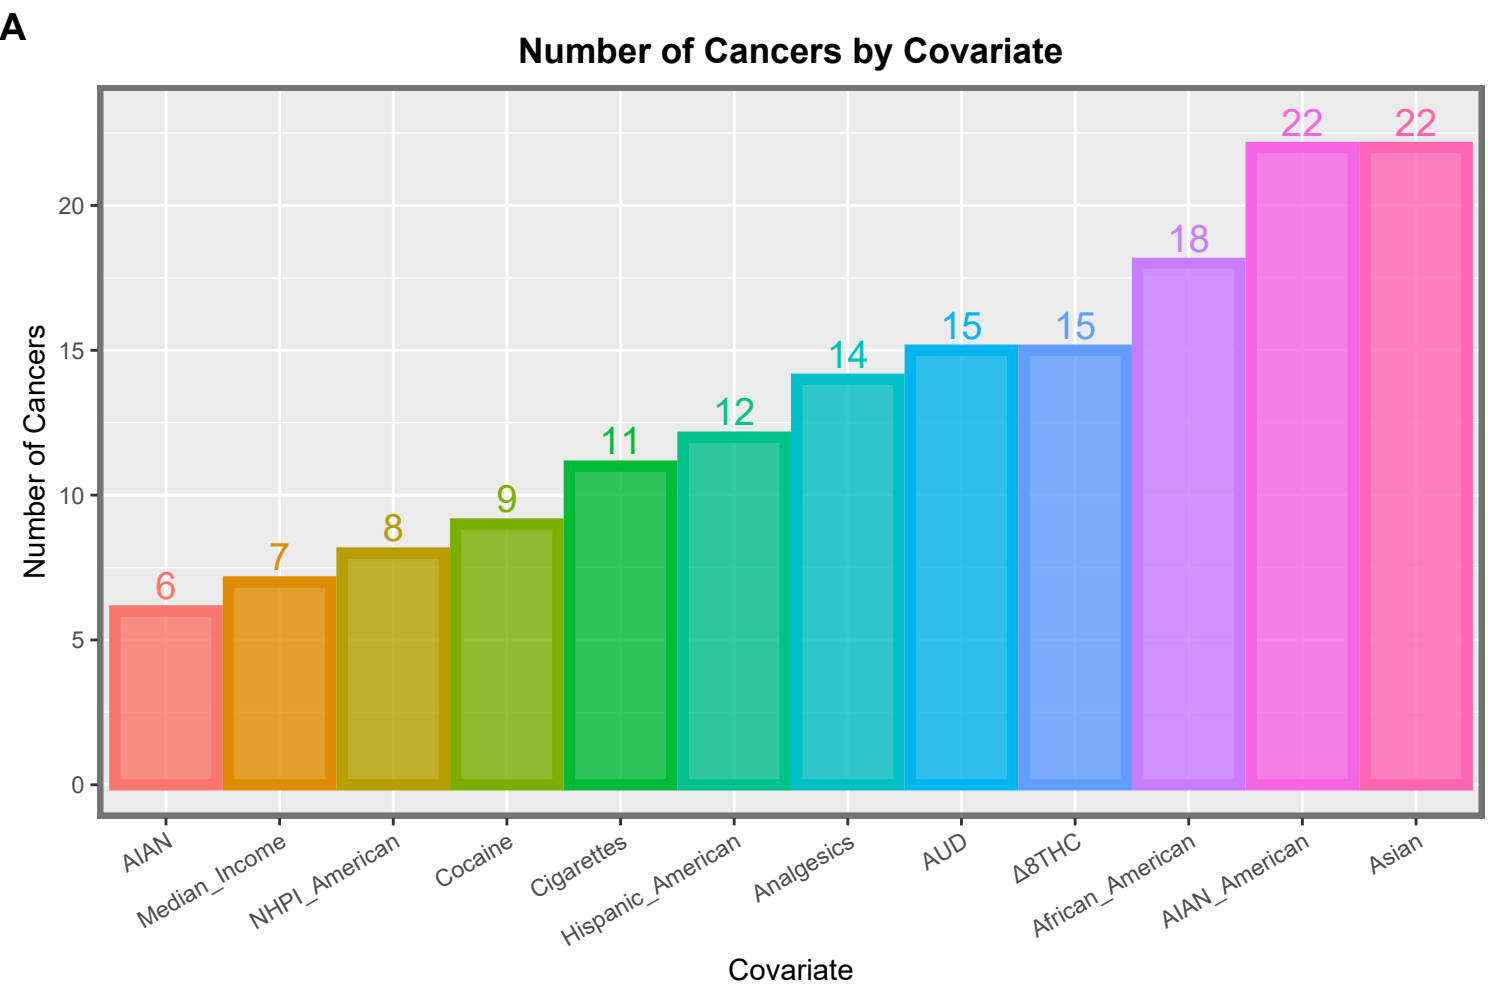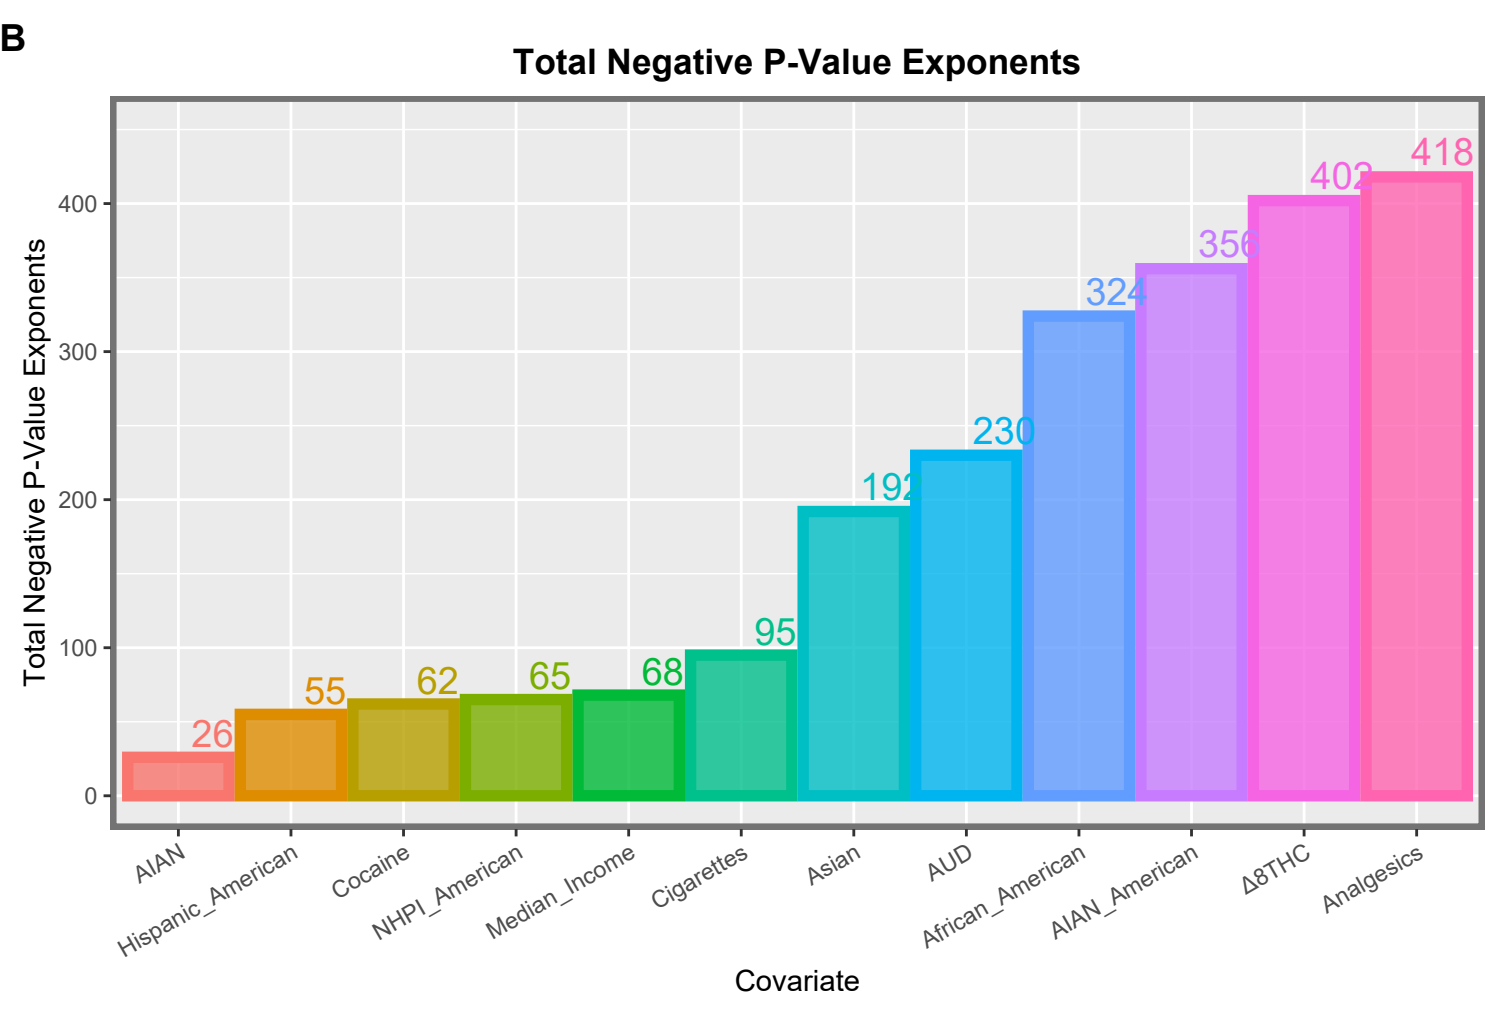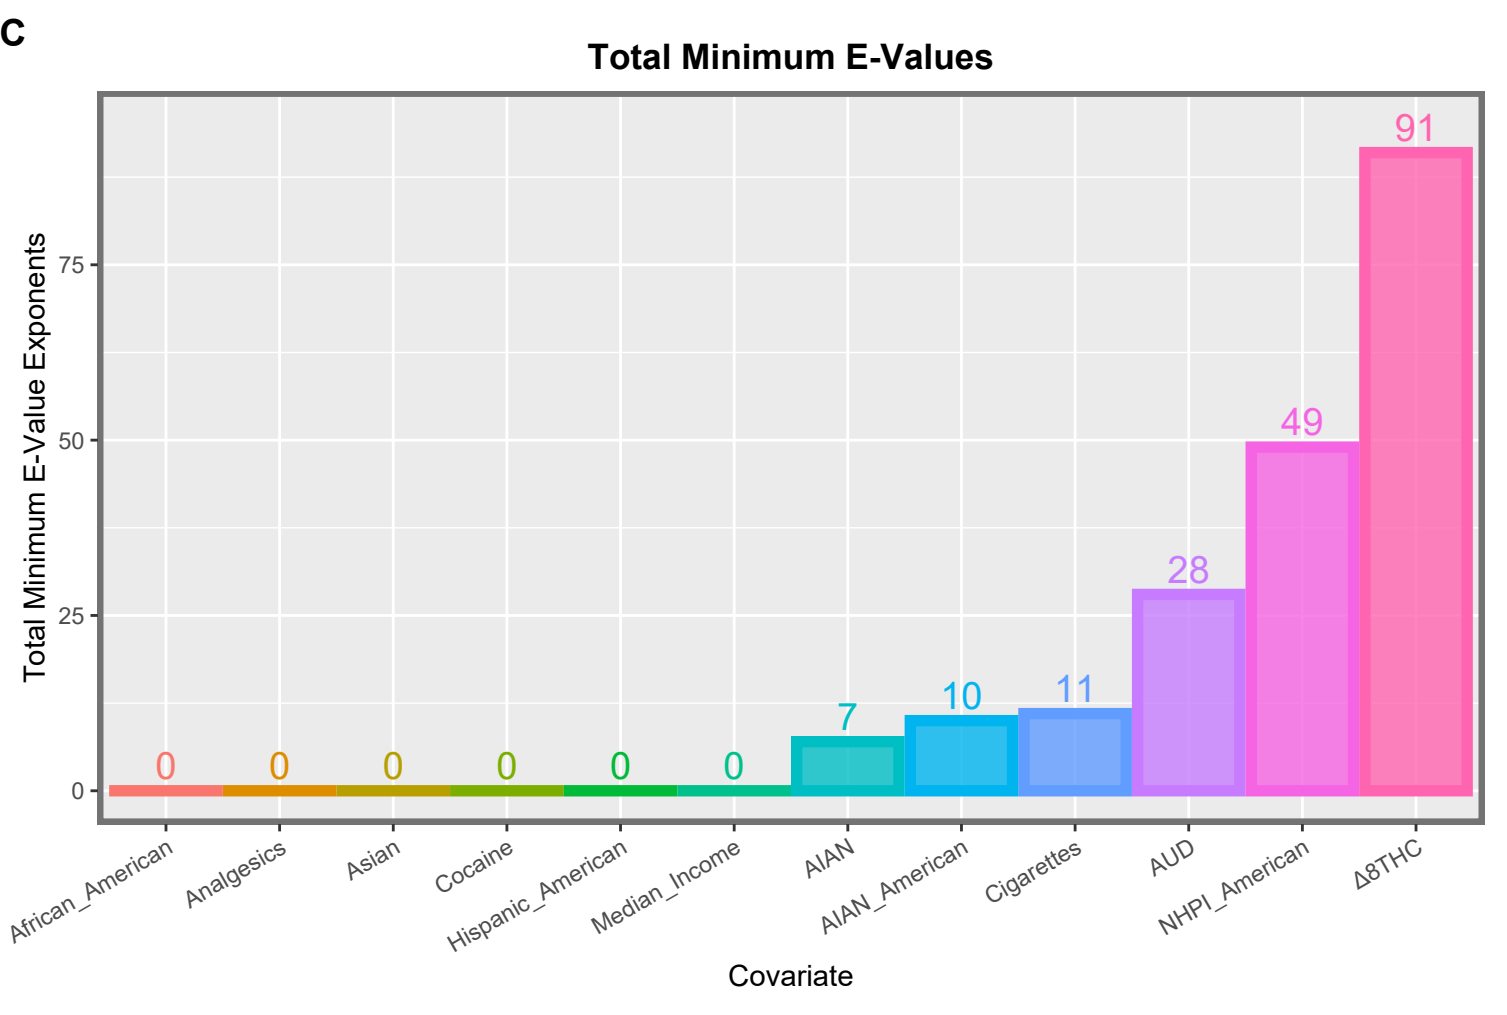



A

Number of Cancers by Covariate

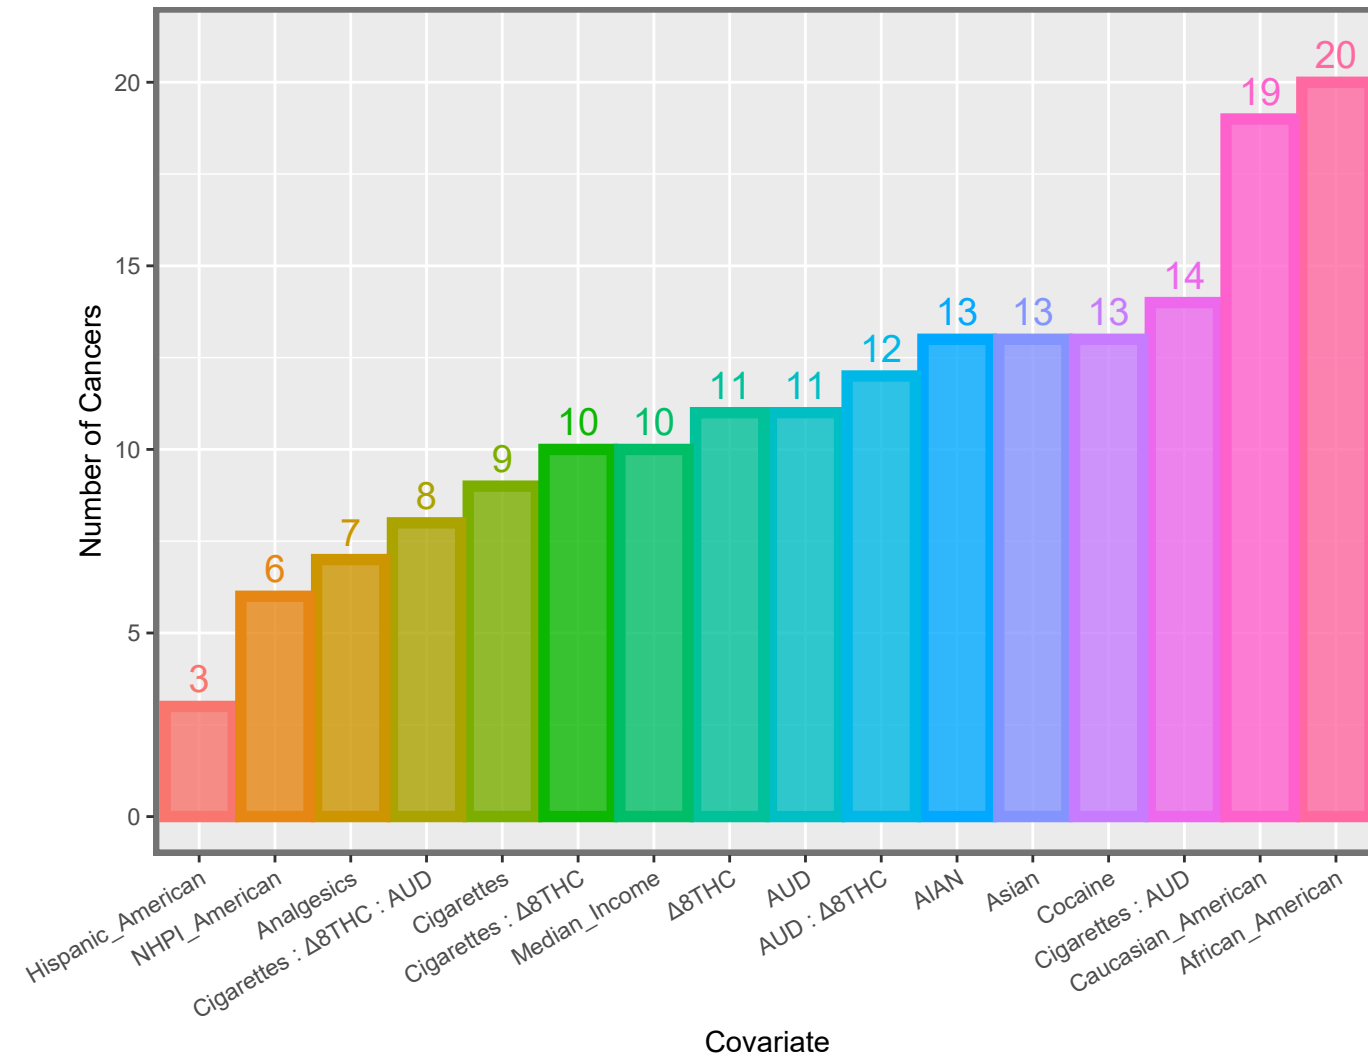

B

Total Negative P-Value Exponents

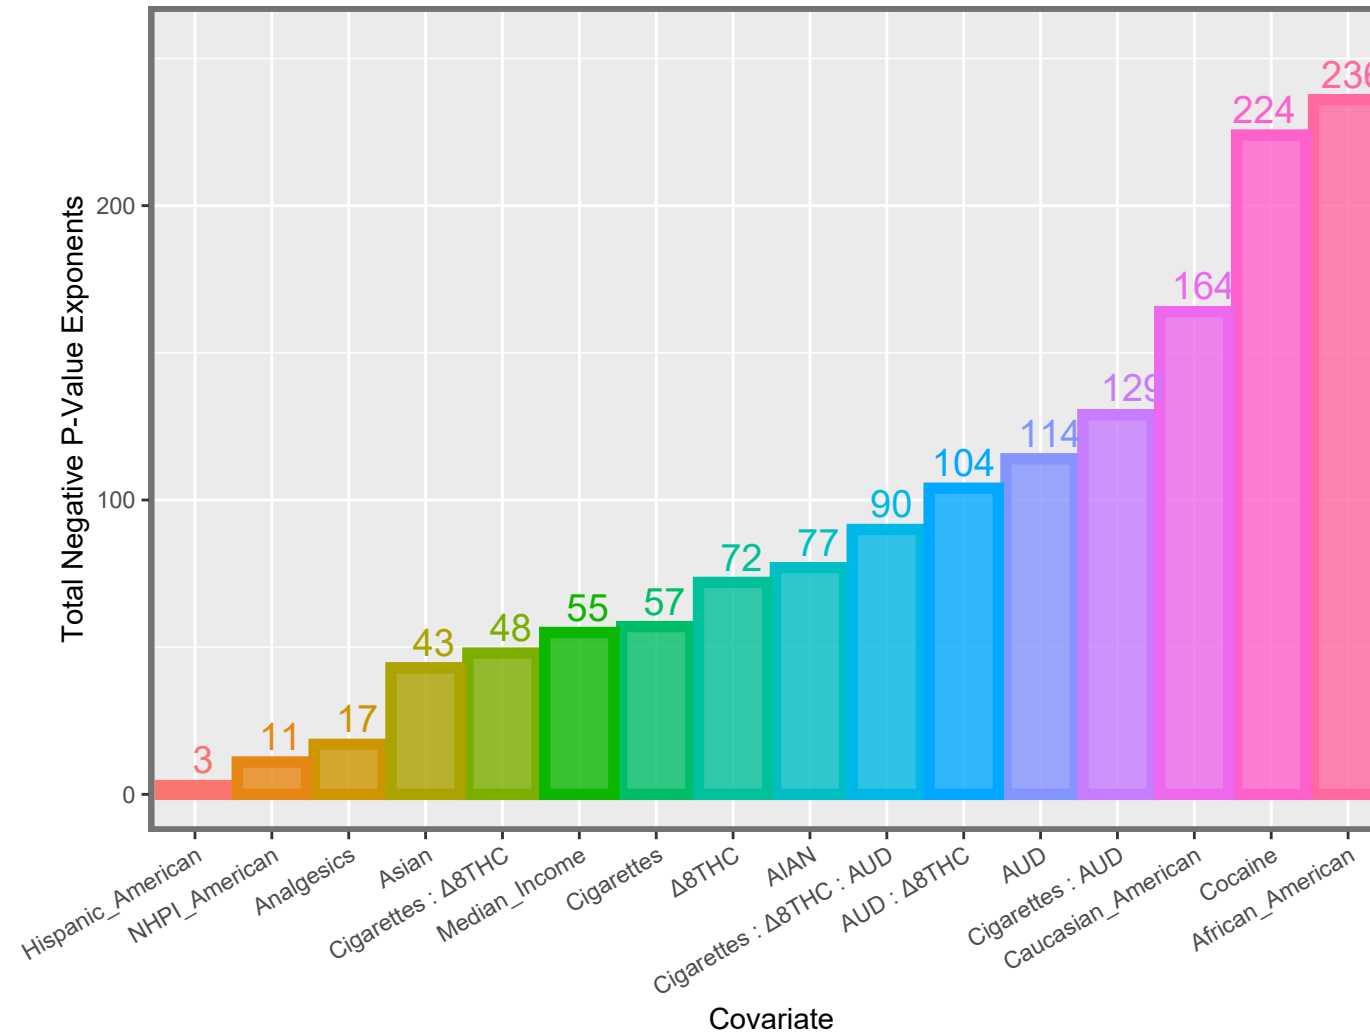

C

Total Minimum E-Values

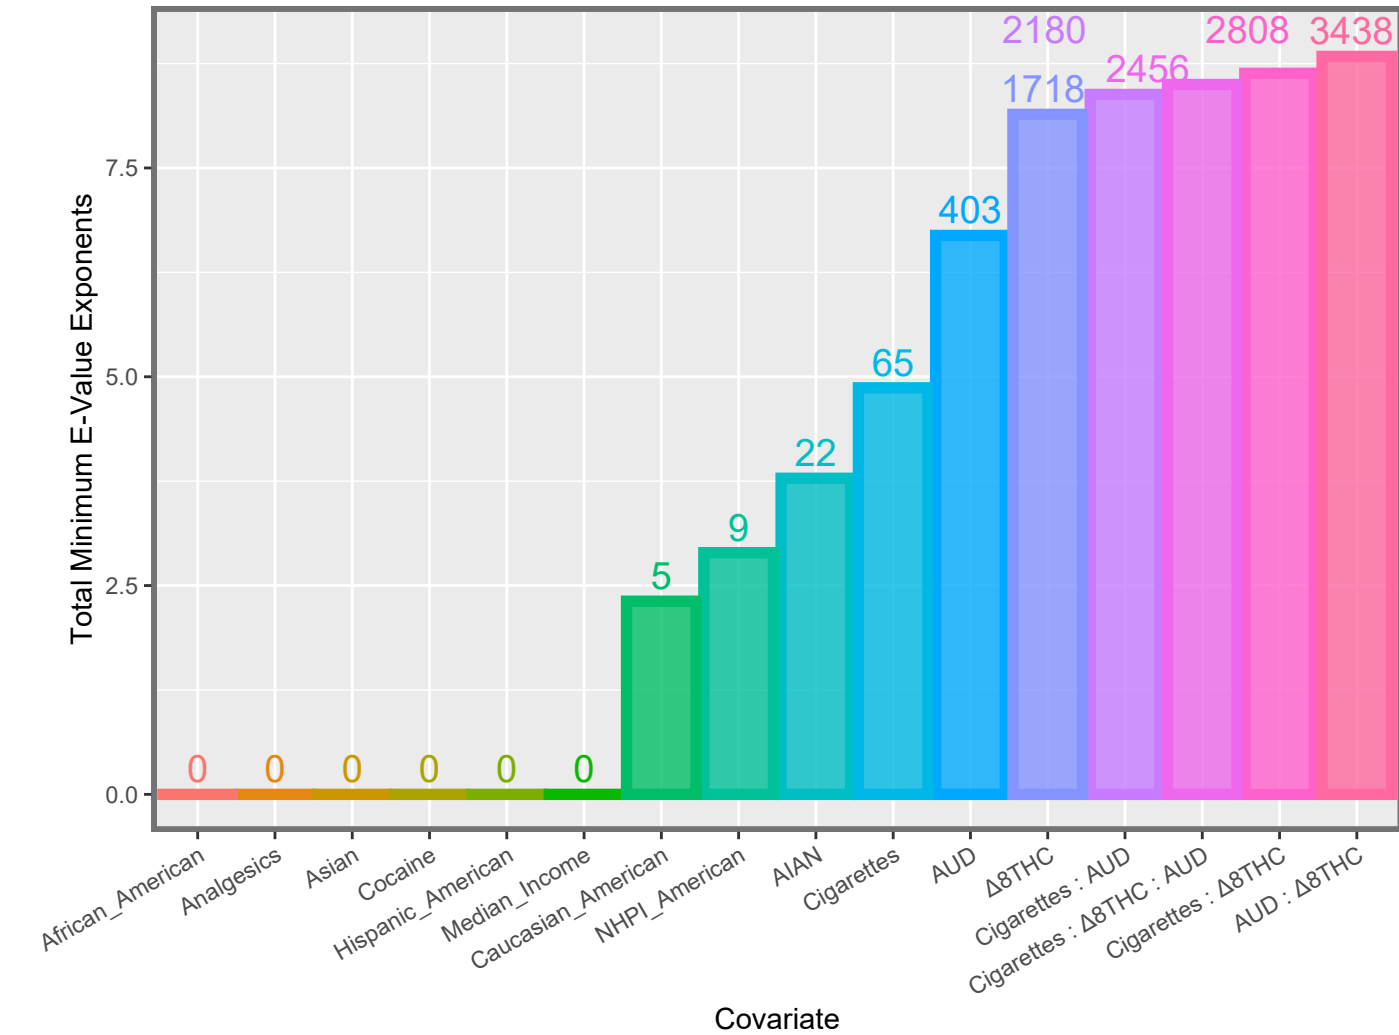

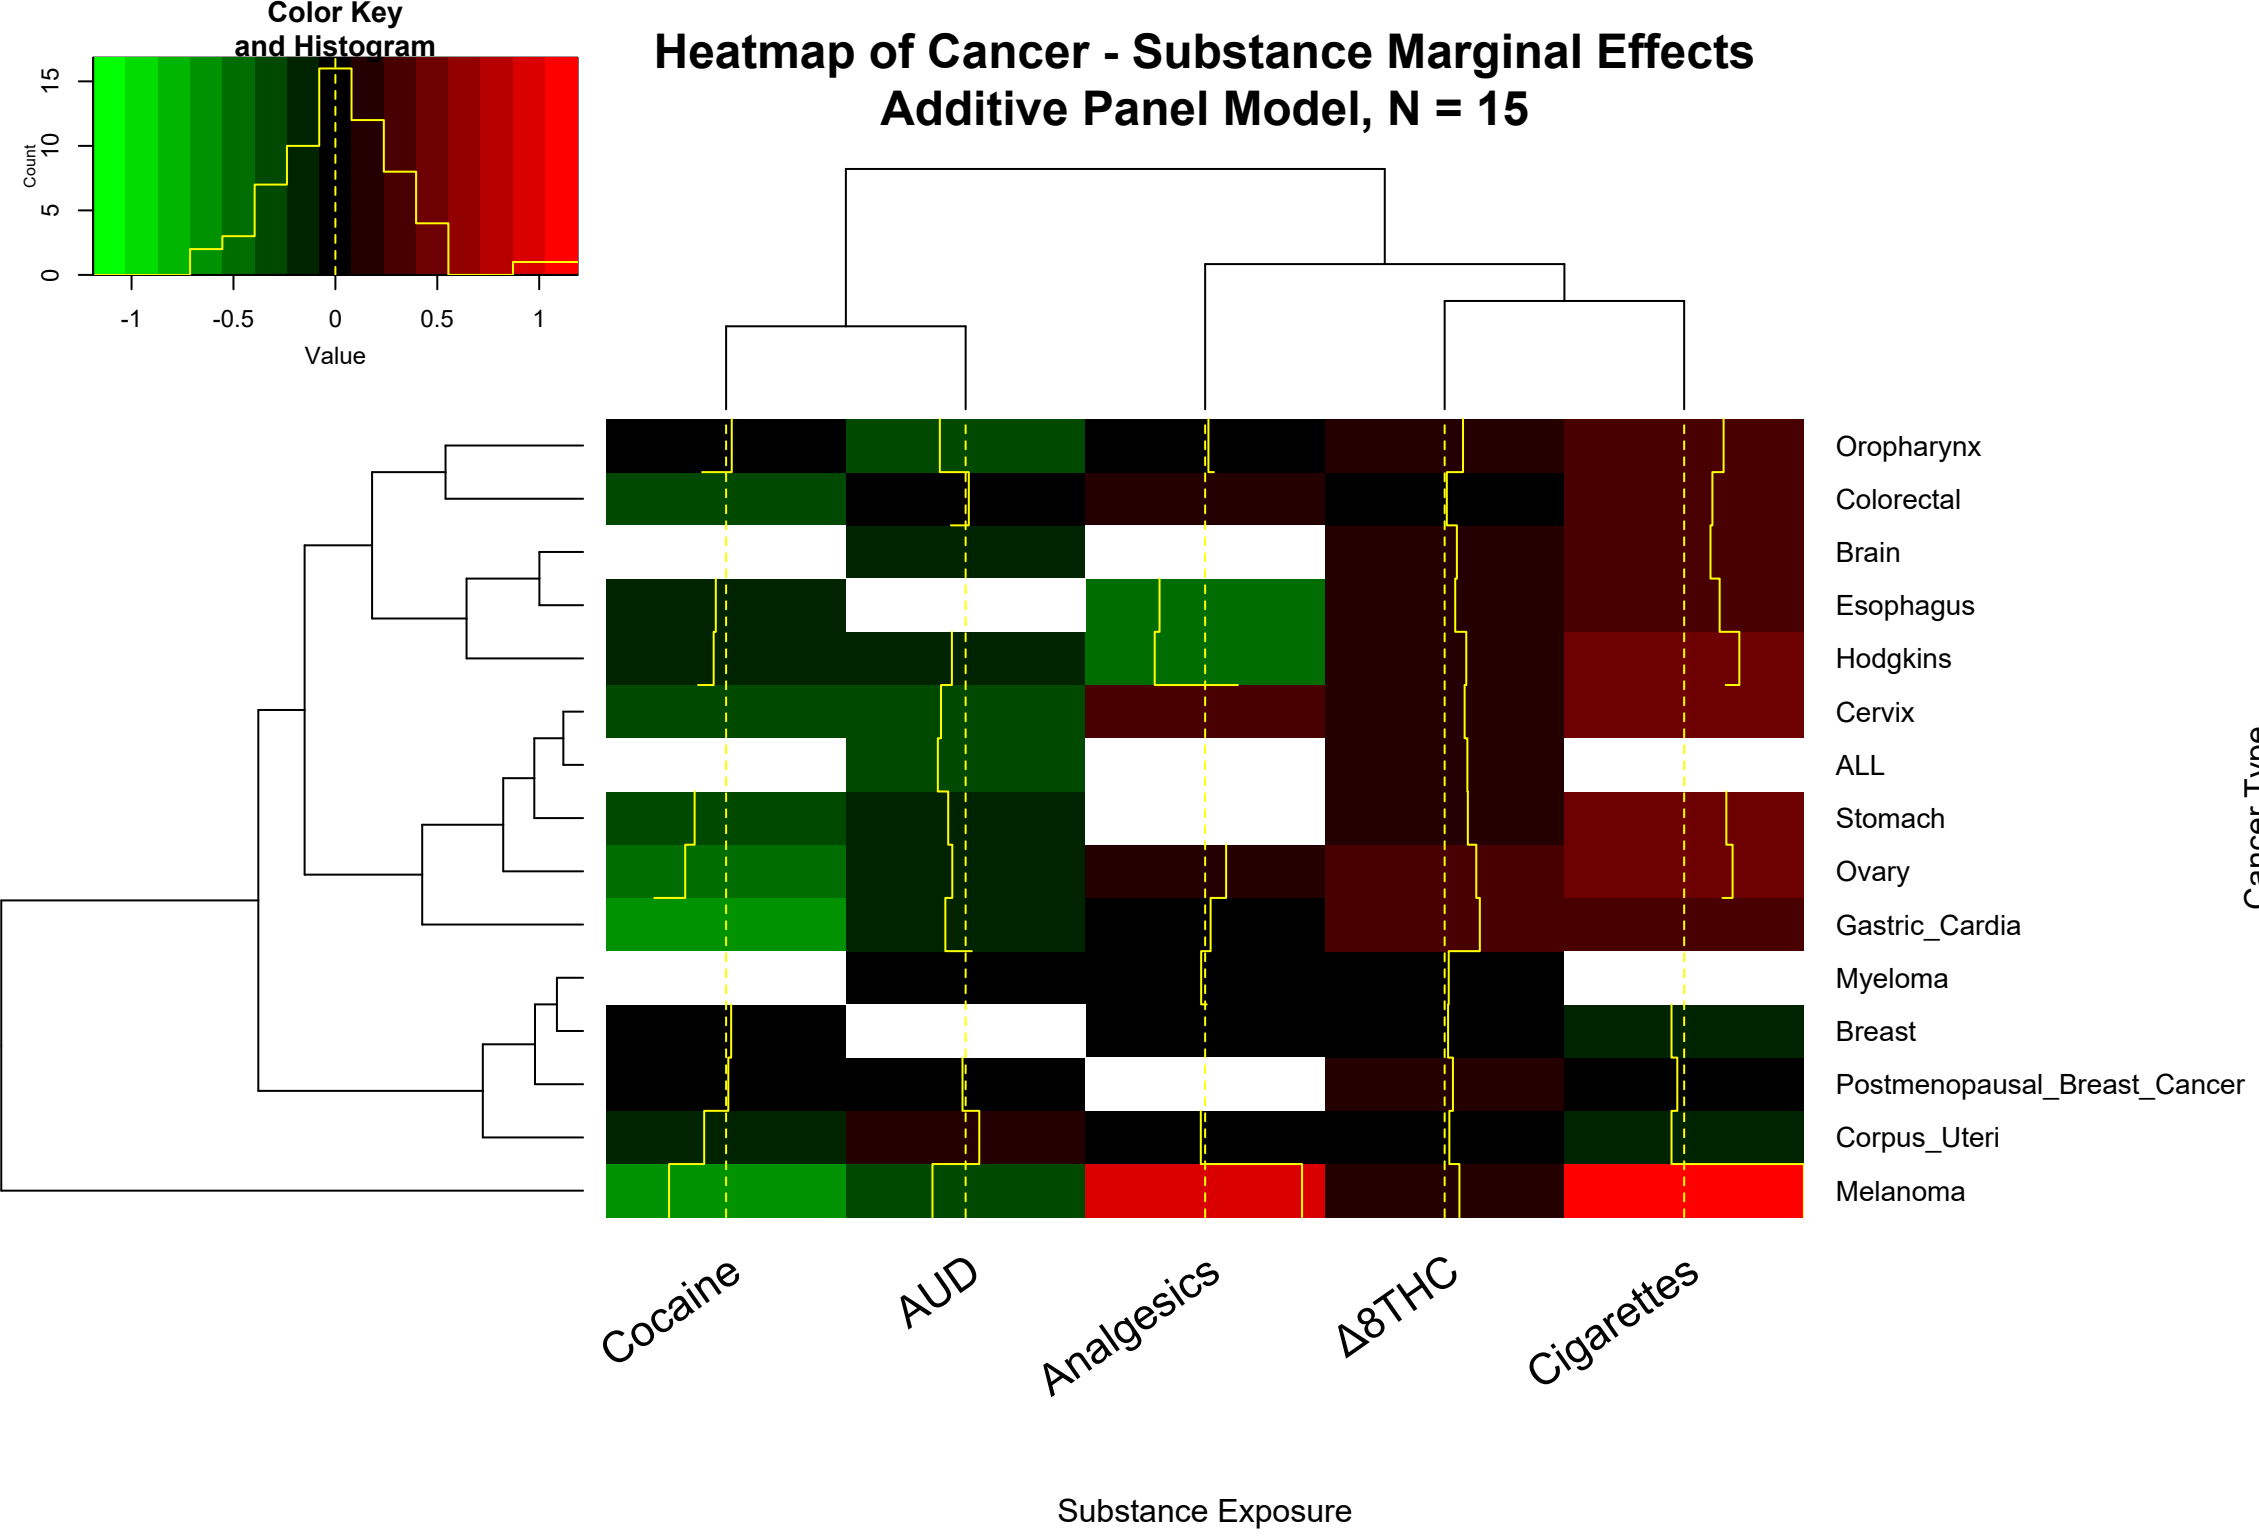



### Heatmap of Cancer - Substance Marginal Effects Interactive Model at 2 Temporal Lags, N = 17

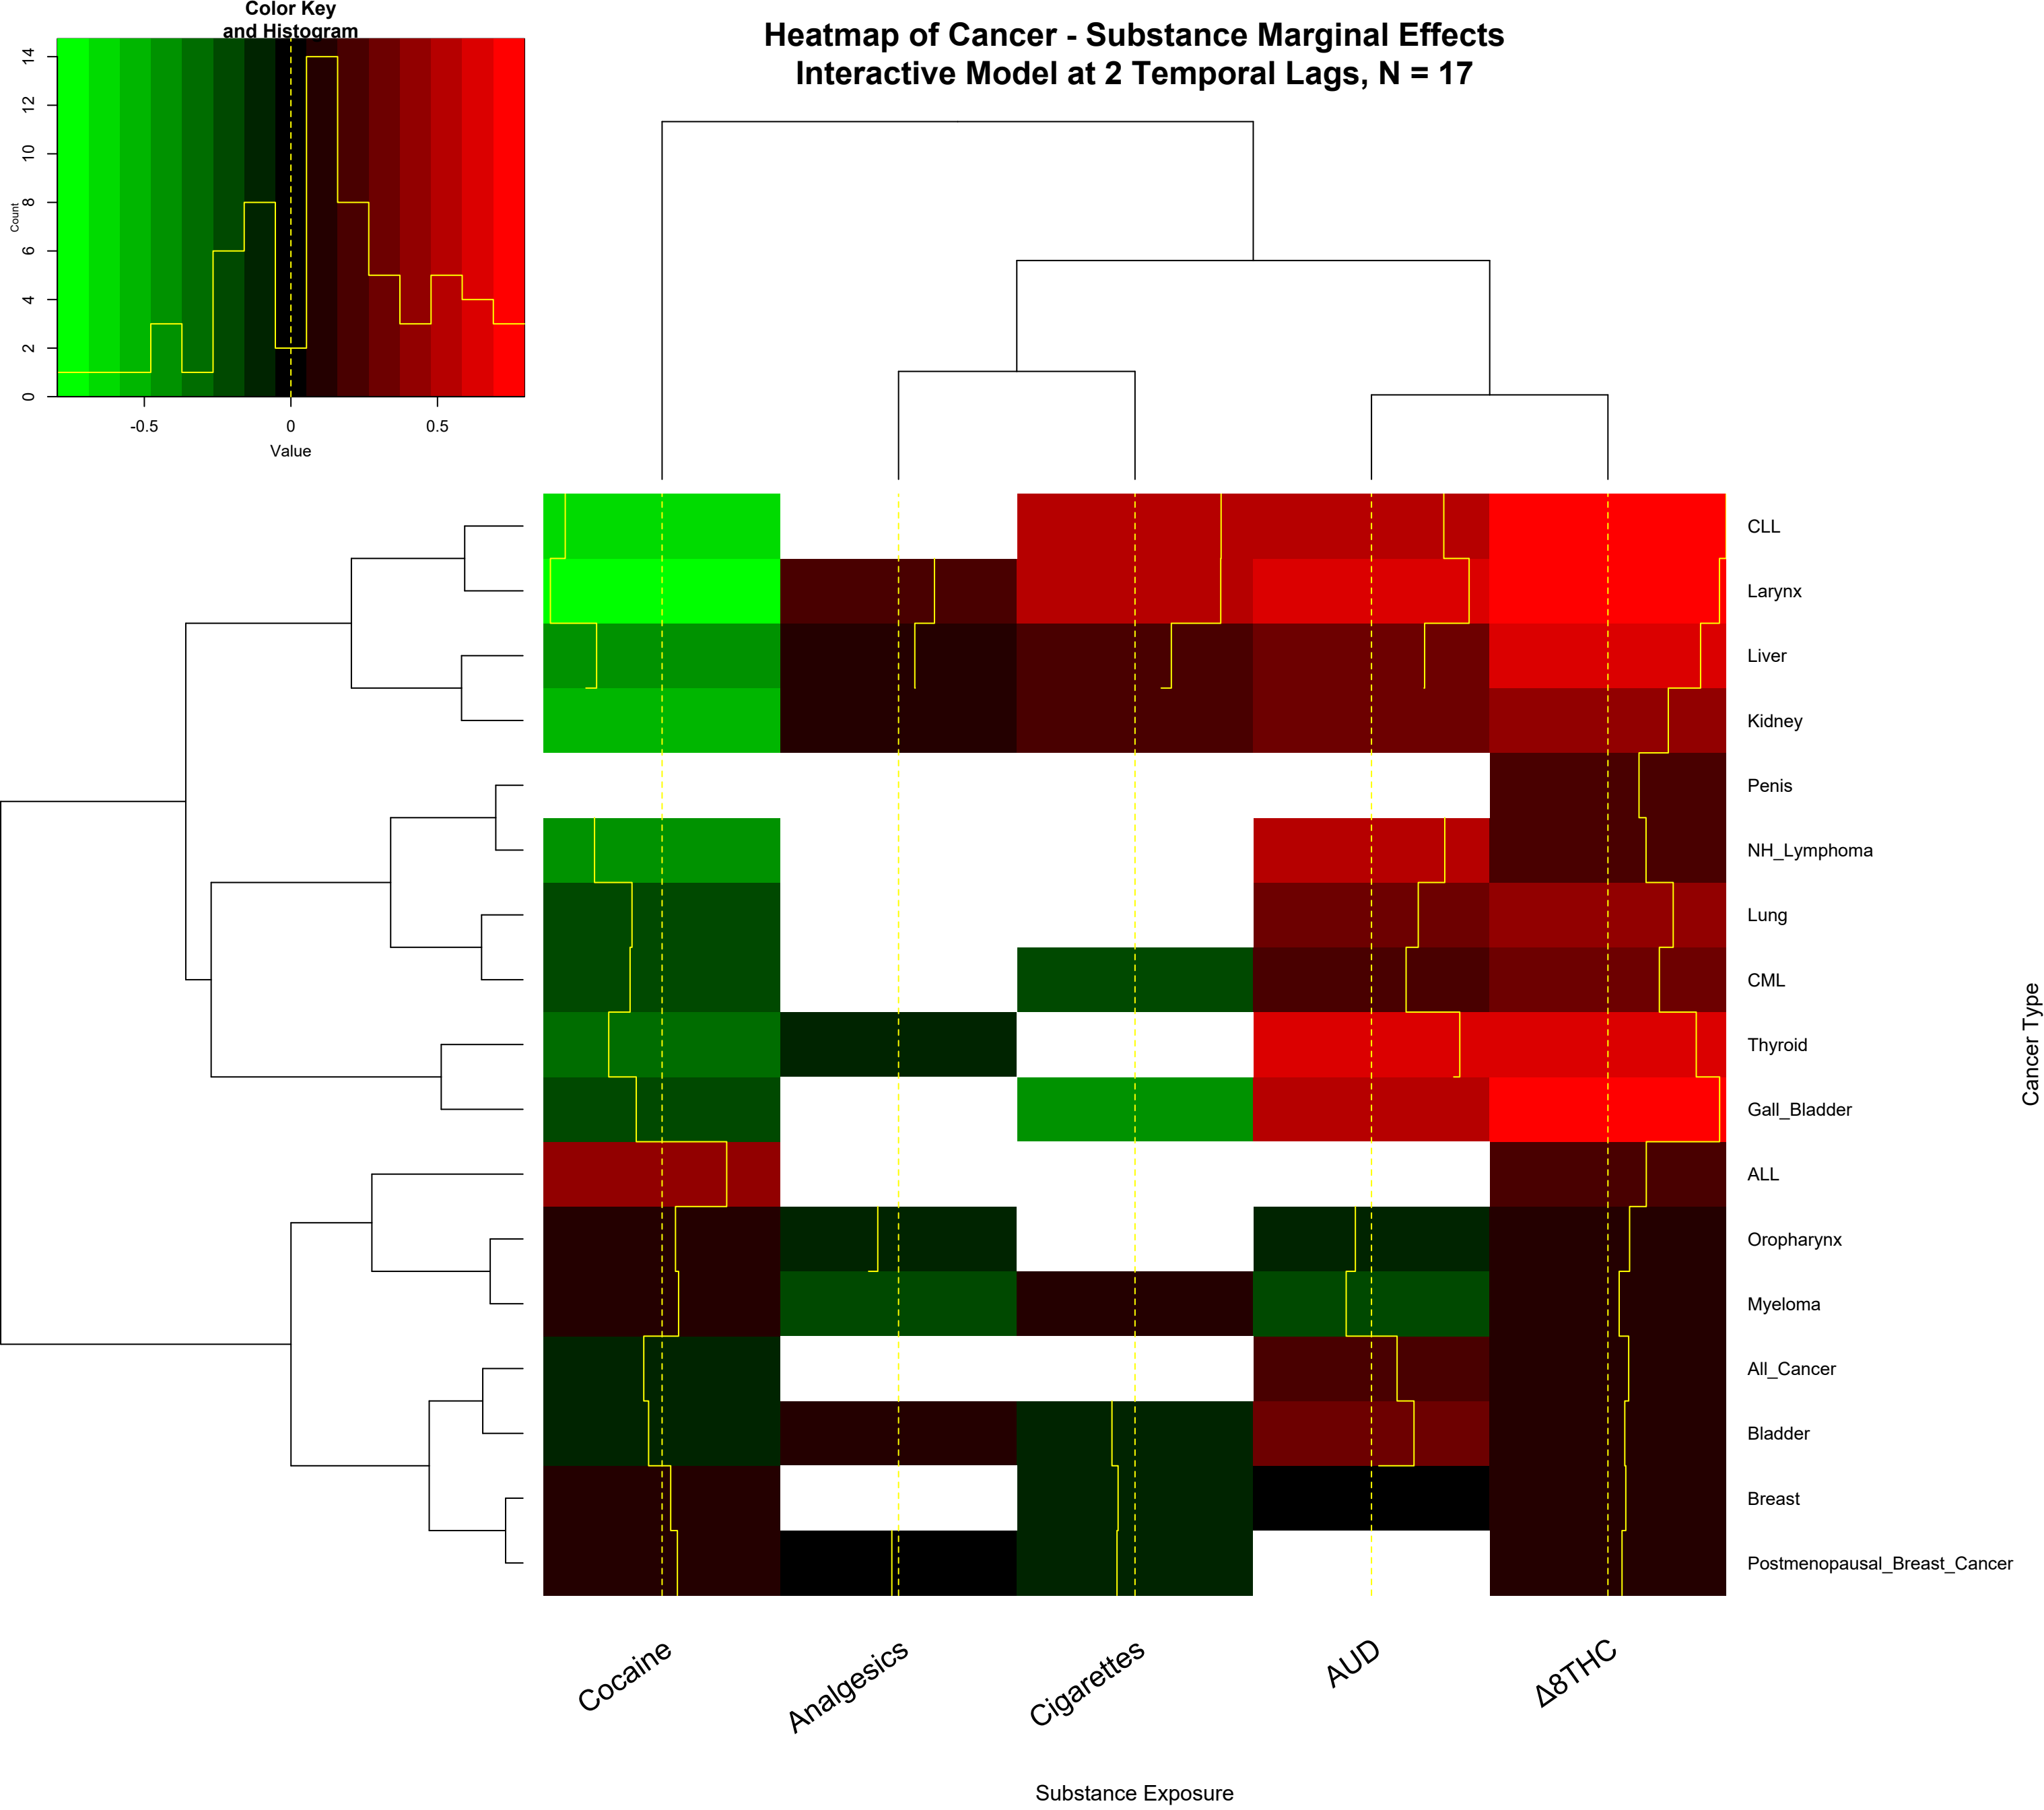

## Color Key and Histogram

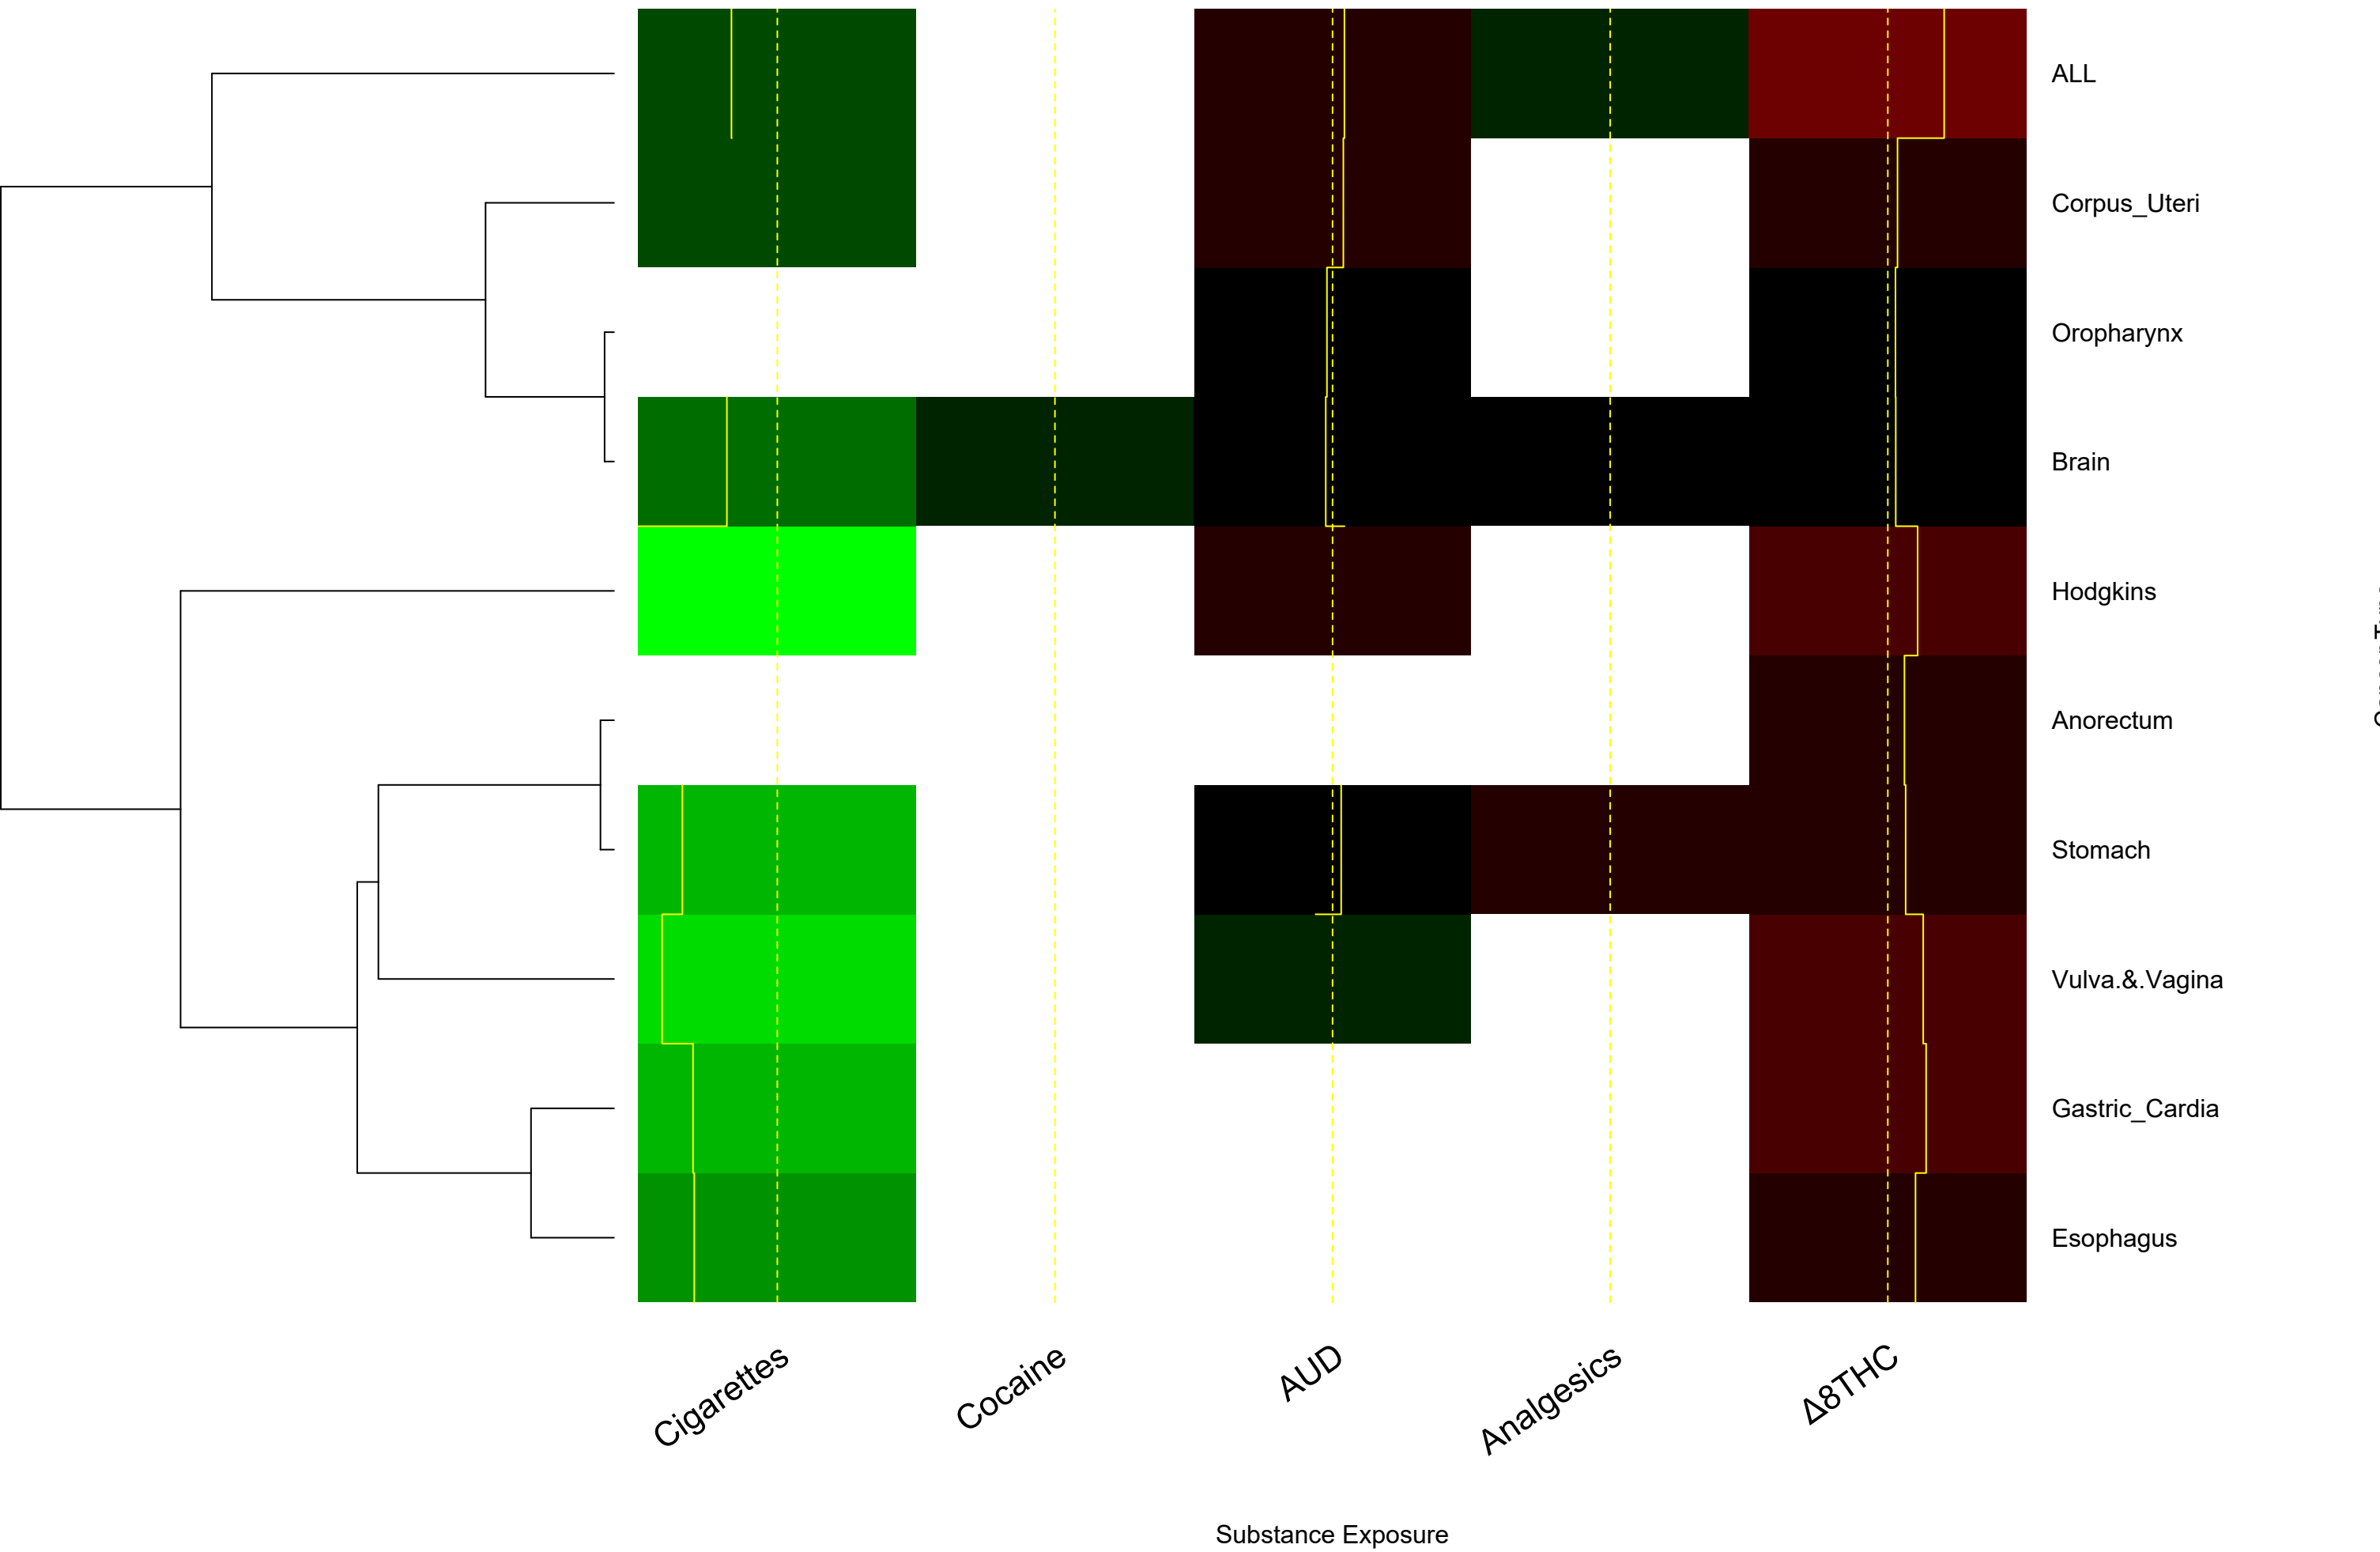

Supplement: s1 [file s1]
